# Supplementary material
Source: PubMed Central journal article supplement (PMC2911956)
Supplement: NIHMS218449-supplement-S1.pdf [file NIHMS218449-supplement-S1.pdf]

### Supplemental Information S1: MS/MS spectra of in vitro modified peptides

**identified in BSA and Histone H4.** The modified residue is in bold and underlined.

<sup>Ethyl</sup>**E**, <sup>-19</sup>**K**, <sup>108</sup>**C**, <sup>Glycerol</sup>**E**, and <sup>Glycerol</sup>**D** represent ethylation of Glutamic acid, loss of 19 Da from Lysine, addition of 108 on Cysteine, esterification of Glutamic acid by glycerol, and esterification of Aspartic acid by glycerol respectively. Oxidation of Cysteine and Methionine are labeled as <sup>O</sup>M and <sup>OOO</sup>C, respectively. The symbols ^, \* in spectral labeling represent b or y ions with ammonium and water loss, respectively.

The peptide sequence, charge state, mass shift, and retention time are listed in each MS/MS spectrum.

#### A. MS/MS spectra of <sup>Ethyl</sup>E peptides identified in BSA.

- A1. MS/MS spectrum of “DAIPENLPPLTADFA<sup>Ethyl</sup>**E**DK” that identified E + ethylation in BSA SDS-PAGE gel band destained either with acetic acid/ethanol/water (10%:50%:40%), or ethanol/water (50%:50%).
- A2. MS/MS spectrum of “<sup>Ethyl</sup>**K**QTALVELLK” that identified E + ethylation in BSA SDS-PAGE gel band destained with acetic acid/ethanol/water (10%:50%:40%).

#### B. MS/MS spectra of <sup>-19</sup>K peptides identified in Histone H4 SDS-PAGE gel band destained with ethanol/water (50%:50%).

- B1. MS/MS spectrum of “EIAQDF<sup>-19</sup>**K**TDLR” that identified K – 19 in Histone H4 SDS-PAGE gel band destained with ethanol/water (50%:50%).
- B2. MS/MS spectrum of “KQLAT<sup>-19</sup>**K**AAAR” that identified K – 19 in Histone H4 SDS-PAGE gel band destained with ethanol/water (50%:50%).
- B3. MS/MS spectrum of “RYQ<sup>-19</sup>**K**STELLIR” that identified K – 19 in Histone H4 SDS-PAGE gel band destained with ethanol/water (50%:50%).
- B4. MS/MS spectrum of “RVTIMP<sup>-19</sup>**K**DIQLAR” that identified K – 19 in Histone H4 SDS-PAGE gel band destained with ethanol/water (50%:50%).
- B5. MS/MS spectrum of “VTIMP<sup>-19</sup>**K**DIQLAR” that identified K – 19 in Histone H4 SDS-PAGE gel band destained with ethanol/water (50%:50%).
- B6. MS/MS spectrum of “DAVTYTEHA<sup>-19</sup>**K**R” that identified K – 19 in Histone H4 SDS-PAGE gel band destained with ethanol/water (50%:50%).
- B7. MS/MS spectrum of “KTVTAMDWYAL<sup>-19</sup>**K**R” that identified K – 19 in Histone H4 SDS-PAGE gel band destained with ethanol/water (50%:50%).

#### C. MS/MS spectra of <sup>108</sup>C peptides identified in BSA gel band destained with ethanol/water (50%:50%).

- C1. MS/MS spectrum of “<sup>O</sup>MP<sup>108</sup>**C**AEDYLSLILNR” peptides identified in BSA SDS-PAGE gel band destained with ethanol/water (50%:50%).
- C2. MS/MS spectrum of “LKPDNTL<sup>108</sup>**C**DEFK” peptides identified in BSA SDS-PAGE gel band destained with ethanol/water (50%:50%).
- C3. MS/MS spectrum of “LKE<sup>108</sup>**C**CDKPLLEK” peptides identified in BSA SDS-PAGE gel band destained with ethanol/water (50%:50%).

- C4. MS/MS spectrum of “LKEC<sup>108</sup>CDKPLLEK” peptides identified in BSA SDS-PAGE gel band destained with ethanol/water (50%:50%).
- C5. MS/MS spectrum of “DDPHA<sup>108</sup>CYSTVFDK” peptides identified in BSA SDS-PAGE gel band destained with ethanol/water (50%:50%).
- C6. MS/MS spectrum of “QN<sup>108</sup>CDQFEK” peptides identified in BSA SDS-PAGE gel band destained with ethanol/water (50%:50%).
- C7. MS/MS spectrum of “VGTR<sup>108</sup>CCTKPESER” peptides identified in BSA SDS-PAGE gel band destained with ethanol/water (50%:50%).
- C8. MS/MS spectrum of “VGTRC<sup>108</sup>CTKPESER” peptides identified in BSA SDS-PAGE gel band destained with ethanol/water (50%:50%).
- C9. MS/MS spectrum of “<sup>O</sup>MP<sup>108</sup>CAEDYLSLILNR” peptides identified in BSA SDS-PAGE gel band destained with ethanol/water (50%:50%).
- C10. MS/MS spectrum of “L<sup>108</sup>CVLHEK” peptides identified in BSA SDS-PAGE gel band destained with ethanol/water (50%:50%).
- C11. MS/MS spectrum of “RP<sup>108</sup>CFSA LTPDETYVPK” peptides identified in BSA SDS-PAGE gel band destained with ethanol/water (50%:50%).
- C12. MS/MS spectrum of “T<sup>000</sup>CVADESHAG<sup>108</sup>CEK” peptides identified in BSA SDS-PAGE gel band destained with ethanol/water (50%:50%).
- C13. MS/MS spectrum of “YNGVFQE<sup>108</sup>CCQAEDK” peptides identified in BSA SDS-PAGE gel band destained with ethanol/water (50%:50%).
- C14. MS/MS spectrum of “QN<sup>108</sup>CDQFEK” peptides identified in BSA SDS-PAGE gel band destained with ethanol/water (50%:50%).
- C15. MS/MS spectrum of “YI<sup>108</sup>CDN<sup>1</sup>QDTISSK” peptides identified in BSA SDS-PAGE gel band destained with ethanol/water (50%:50%).
- C16. MS/MS spectrum of “<sup>108</sup>CCTESLVNR” peptides identified in BSA SDS-PAGE gel band destained with ethanol/water (50%:50%).
- C17. MS/MS spectrum of “<sup>108</sup>CCTKPESER” peptides identified in BSA SDS-PAGE gel band destained with ethanol/water (50%:50%).

D. MS/MS spectra of <sup>glycerol</sup>D/E peptides identified in BSA incubated with 20% glycerol 50 mM ammonium bicarbonate solution at 4 °C for 7 days, followed by in solution digestion with trypsin.

- D1. MS/MS spectrum of “KQTALV<sup>glycerol</sup>ELLK” peptides identified in BSA in 20% glycerol solution.
- D2. MS/MS spectrum of “DTHKS<sup>glycerol</sup>EIAHR” peptides identified in BSA in 20% glycerol solution.
- D3. MS/MS spectrum of “FKDLGE<sup>glycerol</sup>EHFK” peptides identified in BSA in 20% glycerol solution.
- D4. MS/MS spectrum of “DLG<sup>glycerol</sup>EEHFK” peptides identified in BSA in 20% glycerol solution.
- D5. MS/MS spectrum of “LVN<sup>glycerol</sup>ELTEFAK” peptides identified in BSA in 20% glycerol solution.
- D6. MS/MS spectrum of “LVNELT<sup>glycerol</sup>EFAK” peptides identified in BSA in 20% glycerol solution.

- D7. MS/MS spectrum of “AEFV<sup>glycerol</sup>EVTK” peptides identified in BSA in 20% glycerol solution.
- D8. MS/MS spectrum of “RHP<sup>glycerol</sup>EYAVSLLR” peptides identified in BSA in 20% glycerol solution.
- D9. MS/MS spectrum of “HLVD<sup>glycerol</sup>EPQNLIK” peptides identified in BSA in 20% glycerol solution.
- D10. MS/MS spectrum of “QTALV<sup>glycerol</sup>ELLK” peptides identified in BSA in 20% glycerol solution.
- D11. MS/MS spectrum of “KQTALV<sup>glycerol</sup>ELLK” peptides identified in BSA in 20% glycerol solution.
- D12. MS/MS spectrum of “LVT<sup>glycerol</sup>DLTK” peptides identified in BSA in 20% glycerol solution.

A1.

K.DAIPENLPPLTADFAE(+28)DK.D (+2) - Mod : 1.81 at 0(-1) - Retention time : 67.61 min - Precursor m/z : 993.39 - Precursor int. : 4332.640 - Basepeak int. : 4479.670

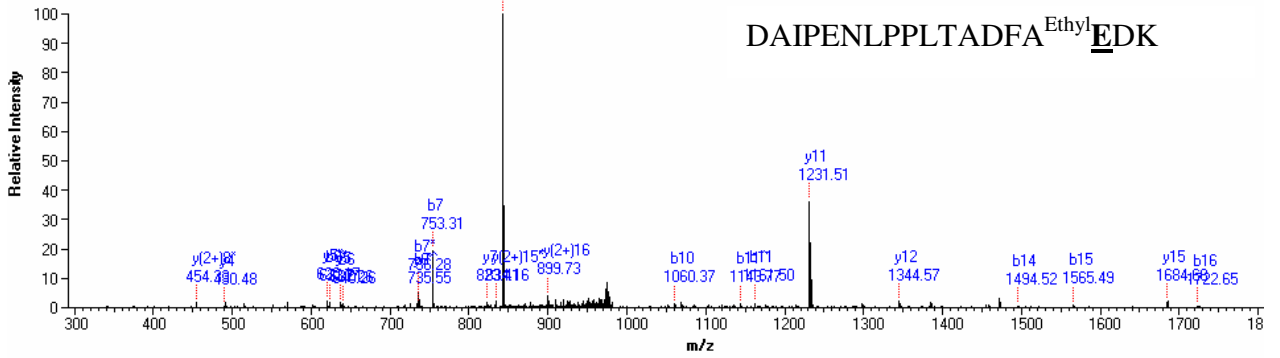

| #  | b       | b++    | b++-H2O | b++-NH3 | b-H2O   | b-NH3   | Seq. | y       | y++    | y++-H2O | y++-NH3 | y-H2O   | y-NH3   | #  |
|----|---------|--------|---------|---------|---------|---------|------|---------|--------|---------|---------|---------|---------|----|
| 1  |         |        |         |         |         |         | D    | 1983.96 | 992.48 | 983.48  | 983.97  | 1965.95 | 1966.93 | 18 |
| 2  | 187.07  |        |         |         | 169.06  |         | A    | 1868.93 | 934.97 | 925.96  | 926.46  | 1850.92 | 1851.91 | 17 |
| 3  | 300.16  |        |         |         | 282.15  |         | I    | 1797.9  | 899.45 | 890.45  | 890.94  | 1779.88 | 1780.87 | 16 |
| 4  | 397.21  |        |         |         | 379.2   |         | P    | 1684.81 | 842.91 | 833.9   | 834.4   | 1666.8  | 1667.78 | 15 |
| 5  | 526.25  |        |         |         | 508.24  |         | E    | 1587.76 | 794.38 | 785.38  | 785.87  | 1569.75 | 1570.73 | 14 |
| 6  | 640.29  | 320.65 | 311.65  | 312.14  | 622.28  | 623.27  | N    | 1458.72 | 729.86 | 720.86  | 721.35  | 1440.7  | 1441.69 | 13 |
| 7  | 753.38  | 377.19 | 368.19  | 368.68  | 735.37  | 736.35  | L    | 1344.67 | 672.84 | 663.83  | 664.33  | 1326.66 | 1327.65 | 12 |
| 8  | 850.43  | 425.72 | 416.71  | 417.21  | 832.42  | 833.4   | P    | 1231.59 | 616.3  | 607.29  | 607.78  | 1213.58 | 1214.56 | 11 |
| 9  | 947.48  | 474.25 | 465.24  | 465.73  | 929.47  | 930.46  | P    | 1134.54 | 567.77 | 558.77  | 559.26  | 1116.53 | 1117.51 | 10 |
| 10 | 1060.57 | 530.79 | 521.78  | 522.27  | 1042.56 | 1043.54 | L    | 1037.48 | 519.25 | 510.24  | 510.73  | 1019.47 | 1020.46 | 9  |
| 11 | 1161.62 | 581.31 | 572.31  | 572.8   | 1143.6  | 1144.59 | T    | 924.4   | 462.7  | 453.7   | 454.19  | 906.39  | 907.37  | 8  |
| 12 | 1232.65 | 616.83 | 607.82  | 608.32  | 1214.64 | 1215.63 | A    | 823.35  | 412.18 | 403.17  | 403.67  | 805.34  | 806.32  | 7  |
| 13 | 1347.68 | 674.34 | 665.34  | 665.83  | 1329.67 | 1330.65 | D    | 752.31  | 376.66 | 367.66  | 368.15  | 734.3   | 735.29  | 6  |
| 14 | 1494.75 | 747.88 | 738.87  | 739.36  | 1476.74 | 1477.72 | F    | 637.29  | 319.15 | 310.14  | 310.63  | 619.28  | 620.26  | 5  |
| 15 | 1565.79 | 783.4  | 774.39  | 774.88  | 1547.77 | 1548.76 | A    | 490.22  |        |         |         | 472.21  | 473.19  | 4  |
| 16 | 1722.83 | 861.92 | 852.91  | 853.4   | 1704.82 | 1705.8  | E"   | 419.18  |        |         |         | 401.17  | 402.16  | 3  |
| 17 | 1837.85 | 919.43 | 910.43  | 910.92  | 1819.84 | 1820.83 | D    | 262.14  |        |         |         | 244.13  | 245.11  | 2  |
| 18 |         |        |         |         |         |         | K    | 147.11  |        |         |         |         | 130.09  | 1  |

A2.

K.KQTALVELLK.H (+2) - Mod : 28.00 at K(1) - Retention time : 52.98 min - Precursor m/z : 586.37 - Precursor int. : 18741.700 - Basepeak int. : 4392.190

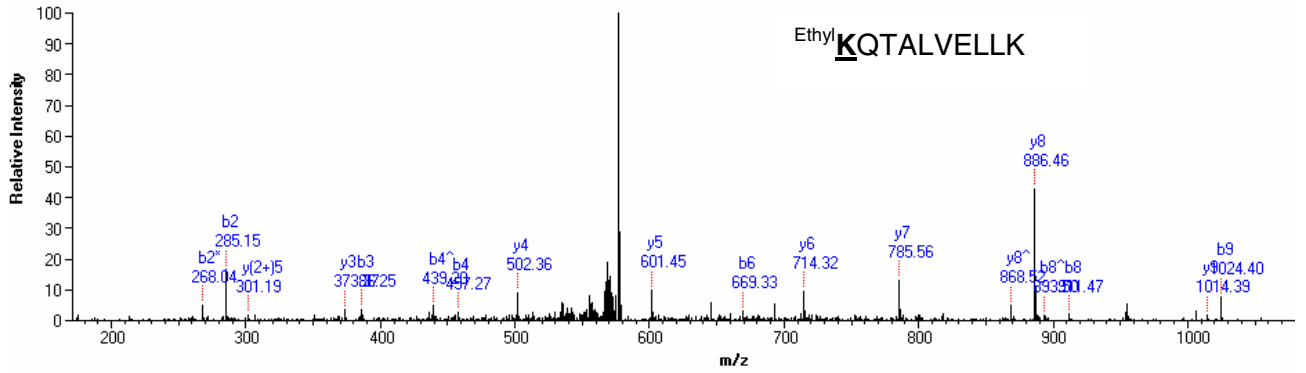

| #  | b       | b++    | b++-H2O | b++-NH3 | b-H2O  | b-NH3   | Seq. | y       | y++    | y++-H2O | y++-NH3 | y-H2O  | y-NH3   | #  |
|----|---------|--------|---------|---------|--------|---------|------|---------|--------|---------|---------|--------|---------|----|
| 1  |         |        |         |         |        |         | K"   | 1170.71 | 585.86 | 576.86  | 577.35  | 1152.7 | 1153.69 | 10 |
| 2  | 285.16  |        |         |         |        | 268.13  | Q    | 1014.62 | 507.81 | 498.81  | 499.3   | 996.61 | 997.59  | 9  |
| 3  | 386.21  |        |         |         | 368.2  | 369.18  | T    | 886.56  | 443.78 | 434.78  | 435.27  | 868.55 | 869.53  | 8  |
| 4  | 457.25  |        |         |         | 439.24 | 440.22  | A    | 785.51  | 393.26 | 384.25  | 384.75  | 767.5  | 768.49  | 7  |
| 5  | 570.33  |        |         |         | 552.32 | 553.3   | L    | 714.48  | 357.74 | 348.74  | 349.23  | 696.46 | 697.45  | 6  |
| 6  | 669.4   | 335.2  | 326.2   | 326.69  | 651.39 | 652.37  | V    | 601.39  | 301.2  | 292.19  | 292.69  | 583.38 | 584.36  | 5  |
| 7  | 798.44  | 399.72 | 390.72  | 391.21  | 780.43 | 781.41  | E    | 502.32  |        |         |         | 484.31 | 485.3   | 4  |
| 8  | 911.53  | 456.27 | 447.26  | 447.75  | 893.51 | 894.5   | L    | 373.28  |        |         |         |        | 356.25  | 3  |
| 9  | 1024.61 | 512.81 | 503.8   | 504.3   | 1006.6 | 1007.58 | L    | 260.2   |        |         |         |        | 243.17  | 2  |
| 10 |         |        |         |         |        |         | K    | 147.11  |        |         |         |        | 130.09  | 1  |

B1.

R.EIAQDFKTDLR.F (+1) - Mod : -19.00 at K(7) - Retention time : 61.73 min - Precursor m/z : 1319.61 - Precursor int. : 7861.340 - Basepeak int. : 6513.940

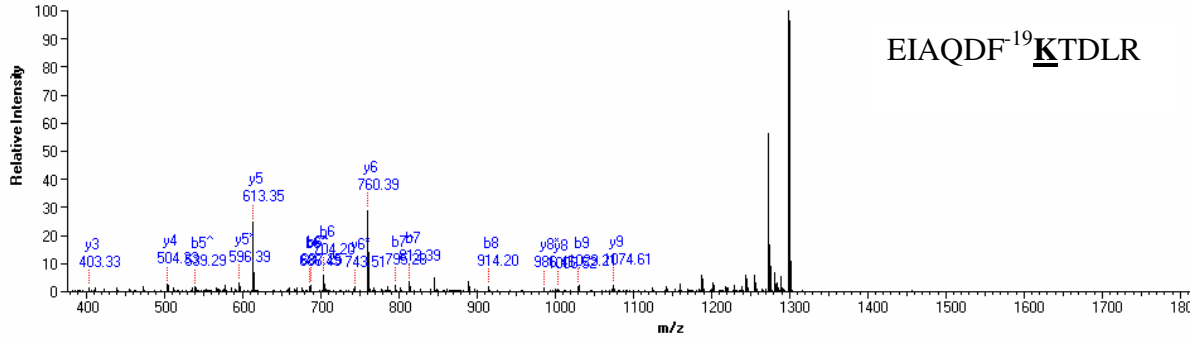

| #  | b       | b++    | b++-H2O | b++-NH3 | b-H2O   | b-NH3   | Seq. | y       | y++    | y++-H2O | y++-NH3 | y-H2O   | y-NH3   | #  |
|----|---------|--------|---------|---------|---------|---------|------|---------|--------|---------|---------|---------|---------|----|
| 1  |         |        |         |         |         |         | E    | 1316.69 | 658.85 | 649.84  | 650.34  | 1298.68 | 1299.66 | 11 |
| 2  | 243.13  |        |         |         | 225.12  |         | I    | 1187.65 | 594.33 | 585.32  | 585.81  | 1169.64 | 1170.62 | 10 |
| 3  | 314.17  |        |         |         | 296.16  |         | A    | 1074.56 | 537.79 | 528.78  | 529.27  | 1056.55 | 1057.54 | 9  |
| 4  | 442.23  |        |         |         | 424.22  | 425.2   | Q    | 1003.53 | 502.27 | 493.26  | 493.75  | 985.52  | 986.5   | 8  |
| 5  | 557.26  |        |         |         | 539.25  | 540.23  | D    | 875.47  | 438.24 | 429.23  | 429.72  | 857.46  | 858.44  | 7  |
| 6  | 704.33  | 352.67 | 343.66  | 344.15  | 686.31  | 687.3   | F    | 760.44  | 380.72 | 371.72  | 372.21  | 742.43  | 743.41  | 6  |
| 7  | 813.42  | 407.21 | 398.21  | 398.7   | 795.41  | 796.39  | K"   | 613.37  | 307.19 | 298.18  | 298.68  | 595.36  | 596.35  | 5  |
| 8  | 914.47  | 457.74 | 448.73  | 449.22  | 896.46  | 897.44  | T    | 504.28  |        |         |         | 486.27  | 487.25  | 4  |
| 9  | 1029.5  | 515.25 | 506.25  | 506.74  | 1011.48 | 1012.47 | D    | 403.23  |        |         |         | 385.22  | 386.2   | 3  |
| 10 | 1142.58 | 571.79 | 562.79  | 563.28  | 1124.57 | 1125.55 | L    | 288.2   |        |         |         |         | 271.18  | 2  |
| 11 |         |        |         |         |         |         | R    | 175.12  |        |         |         |         | 158.09  | 1  |

B2.

R.KQLATKAAR.K (+2) - Mod : -19.00 at K(6) - Retention time : 19.26 min - Precursor m/z : 484.39 - Precursor int. : 4475.630 - Basepeak int. : 6192.310

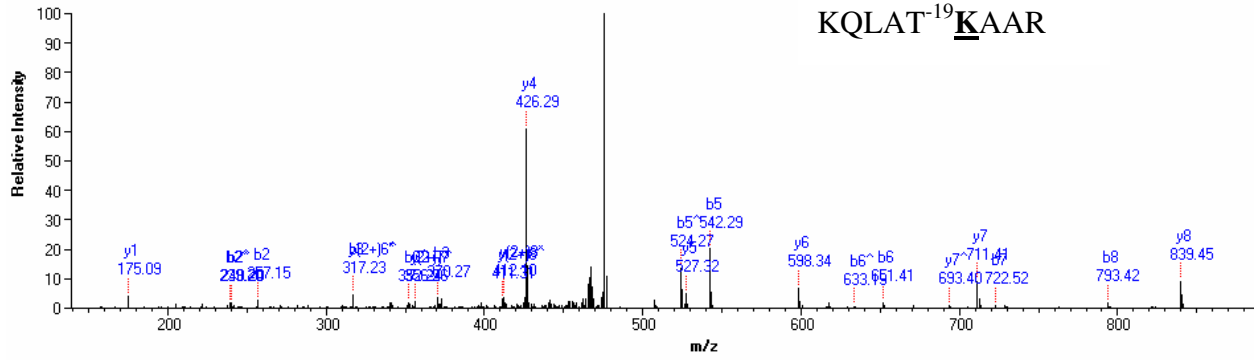

| # | b      | b++    | b+++H2O | b+++NH3 | b-H2O  | b-NH3  | Seq. | y      | y++    | y+++H2O | y+++NH3 | y-H2O  | y-NH3  | # |
|---|--------|--------|---------|---------|--------|--------|------|--------|--------|---------|---------|--------|--------|---|
| 1 |        |        |         |         |        |        | K    | 967.61 | 484.31 | 475.3   | 475.8   | 949.6  | 950.58 | 9 |
| 2 | 257.16 |        |         |         |        | 240.13 | Q    | 839.52 | 420.26 | 411.26  | 411.75  | 821.5  | 822.49 | 8 |
| 3 | 370.25 |        |         |         |        | 353.22 | L    | 711.46 | 356.23 | 347.23  | 347.72  | 693.45 | 694.43 | 7 |
| 4 | 441.28 |        |         |         |        | 424.26 | A    | 598.37 |        |         |         | 580.36 | 581.35 | 6 |
| 5 | 542.33 |        |         |         | 524.32 | 525.3  | T    | 527.34 |        |         |         | 509.32 | 510.31 | 5 |
| 6 | 651.43 | 326.22 | 317.21  | 317.7   | 633.41 | 634.4  | K"   | 426.29 |        |         |         |        | 409.26 | 4 |
| 7 | 722.46 | 361.73 | 352.73  | 353.22  | 704.45 | 705.44 | A    | 317.19 |        |         |         |        | 300.17 | 3 |
| 8 | 793.5  | 397.25 | 388.25  | 388.74  | 775.49 | 776.47 | A    | 246.16 |        |         |         |        | 229.13 | 2 |
| 9 |        |        |         |         |        |        | R    | 175.12 |        |         |         |        | 158.09 | 1 |

B3.

R.RYQKSTELLIR.K (+2) - Mod : -19.00 at K(4) - Retention time : 47.48 min - Precursor m/z : 694.50 - Precursor int. : 14516.500 - Basepeak int. : 4215.110

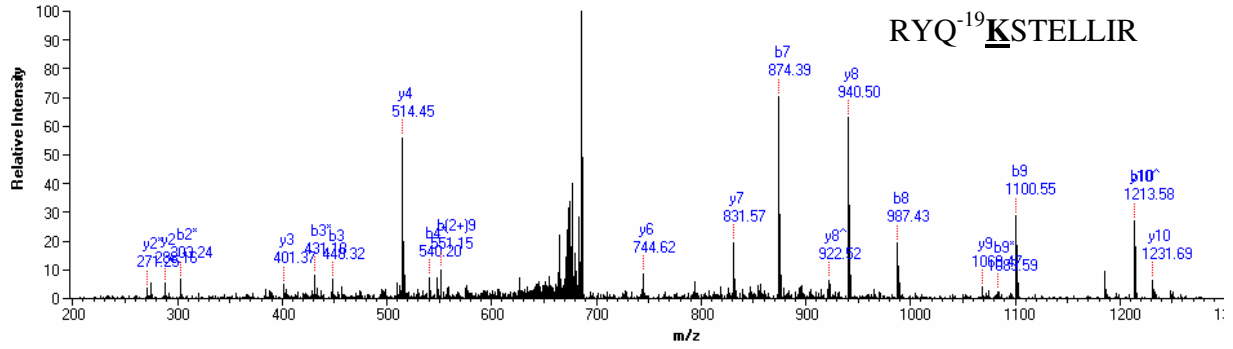

| #  | b       | b++    | b+++H2O | b+++NH3 | b-H2O   | b-NH3   | Seq. | y       | y++    | y++H2O | y++NH3 | y-H2O   | y-NH3   | #  |
|----|---------|--------|---------|---------|---------|---------|------|---------|--------|--------|--------|---------|---------|----|
| 1  |         |        |         |         |         |         | R    | 1387.81 | 694.41 | 685.4  | 685.9  | 1369.8  | 1370.78 | 11 |
| 2  | 320.17  |        |         |         |         | 303.15  | Y    | 1231.71 | 616.36 | 607.35 | 607.85 | 1213.7  | 1214.68 | 10 |
| 3  | 448.23  |        |         |         |         | 431.2   | Q    | 1068.65 | 534.83 | 525.82 | 526.31 | 1050.64 | 1051.62 | 9  |
| 4  | 557.33  |        |         |         |         | 540.3   | K"   | 940.59  | 470.8  | 461.79 | 462.28 | 922.58  | 923.56  | 8  |
| 5  | 644.36  | 322.68 | 313.68  | 314.17  | 626.35  | 627.33  | S    | 831.49  | 416.25 | 407.24 | 407.74 | 813.48  | 814.47  | 7  |
| 6  | 745.41  | 373.21 | 364.2   | 364.69  | 727.39  | 728.38  | T    | 744.46  | 372.73 | 363.73 | 364.22 | 726.45  | 727.43  | 6  |
| 7  | 874.45  | 437.73 | 428.72  | 429.21  | 856.44  | 857.42  | E    | 643.41  | 322.21 | 313.2  | 313.7  | 625.4   | 626.39  | 5  |
| 8  | 987.53  | 494.27 | 485.26  | 485.76  | 969.52  | 970.51  | L    | 514.37  |        |        |        |         | 497.34  | 4  |
| 9  | 1100.62 | 550.81 | 541.81  | 542.3   | 1082.61 | 1083.59 | L    | 401.29  |        |        |        |         | 384.26  | 3  |
| 10 | 1213.7  | 607.35 | 598.35  | 598.84  | 1195.69 | 1196.67 | I    | 288.2   |        |        |        |         | 271.18  | 2  |
| 11 |         |        |         |         |         |         | R    | 175.12  |        |        |        |         | 158.09  | 1  |



B4.

K.RVTIMPKDIQLAR.R (+2) - Mod : -19.00 at K(7) - Retention time : 56.01 min - Precursor m/z : 761.48 - Precursor int. : 36909.000 - Basepeak int. : 7038.080

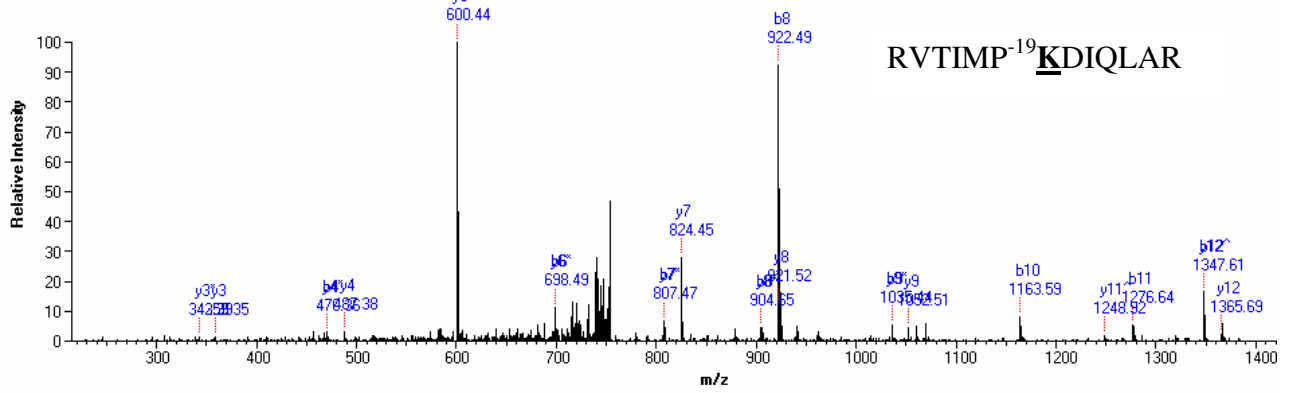

| #  | b       | b++    | b++-H2O | b++-NH3 | b-H2O   | b-NH3   | Seq. | y       | y++    | y++-H2O | y++-NH3 | y-H2O   | y-NH3   | #  |
|----|---------|--------|---------|---------|---------|---------|------|---------|--------|---------|---------|---------|---------|----|
| 1  |         |        |         |         |         |         | R    | 1521.9  | 761.45 | 752.45  | 752.94  | 1503.89 | 1504.87 | 13 |
| 2  | 256.18  |        |         |         |         | 239.15  | V    | 1365.8  | 683.4  | 674.4   | 674.89  | 1347.79 | 1348.77 | 12 |
| 3  | 357.23  |        |         |         | 339.21  | 340.2   | T    | 1266.73 | 633.87 | 624.86  | 625.35  | 1248.72 | 1249.7  | 11 |
| 4  | 470.31  |        |         |         | 452.3   | 453.28  | I    | 1165.68 | 583.34 | 574.34  | 574.83  | 1147.67 | 1148.65 | 10 |
| 5  | 601.35  | 301.18 | 292.17  | 292.67  | 583.34  | 584.32  | M    | 1052.6  | 526.8  | 517.8   | 518.29  | 1034.59 | 1035.57 | 9  |
| 6  | 698.4   | 349.7  | 340.7   | 341.19  | 680.39  | 681.38  | P    | 921.56  | 461.28 | 452.28  | 452.77  | 903.55  | 904.53  | 8  |
| 7  | 807.5   | 404.25 | 395.25  | 395.74  | 789.49  | 790.47  | K"   | 824.5   | 412.76 | 403.75  | 404.24  | 806.49  | 807.48  | 7  |
| 8  | 922.52  | 461.77 | 452.76  | 453.25  | 904.51  | 905.5   | D    | 715.41  | 358.21 | 349.2   | 349.69  | 697.4   | 698.38  | 6  |
| 9  | 1035.61 | 518.31 | 509.3   | 509.79  | 1017.6  | 1018.58 | I    | 600.38  | 300.69 |         | 292.18  |         | 583.36  | 5  |
| 10 | 1163.67 | 582.34 | 573.33  | 573.82  | 1145.66 | 1146.64 | Q    | 487.3   |        |         |         |         | 470.27  | 4  |
| 11 | 1276.75 | 638.88 | 629.87  | 630.37  | 1258.74 | 1259.72 | L    | 359.24  |        |         |         |         | 342.21  | 3  |
| 12 | 1347.79 | 674.4  | 665.39  | 665.88  | 1329.78 | 1330.76 | A    | 246.16  |        |         |         |         | 229.13  | 2  |
| 13 |         |        |         |         |         |         | R    | 175.12  |        |         |         |         | 158.09  | 1  |

B5.

R.VTIMP<sup>19</sup>KDIQLAR (+2) - Mod : -19.00 at K(6) - Retention time : 71.69 min - Precursor m/z : 683.98 - Precursor int. : 15120.600 - Basepeak int. : 7247.580

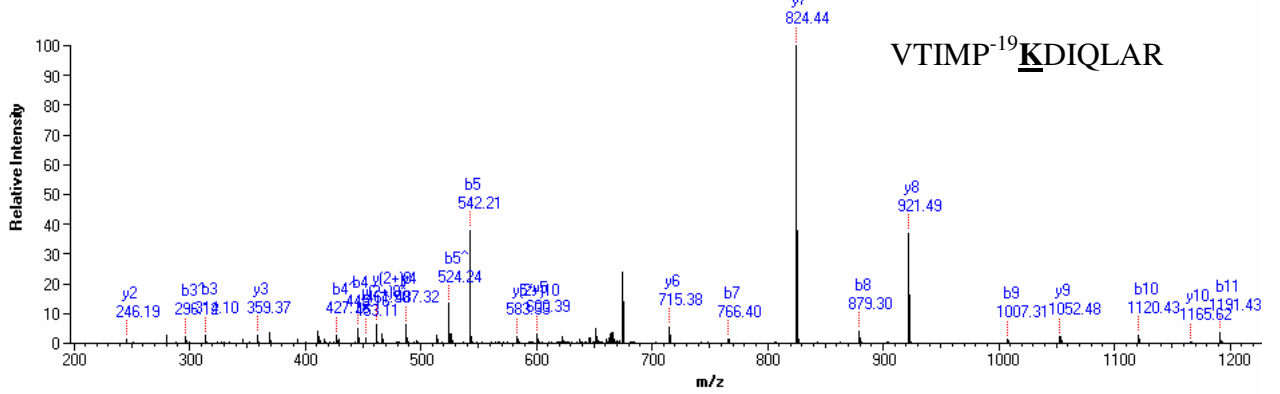

| #  | b       | b++    | b+++H2O | b+++NH3 | b-H2O   | b-NH3   | Seq. | y       | y++    | y+++H2O | y+++NH3 | y-H2O   | y-NH3   | #  |
|----|---------|--------|---------|---------|---------|---------|------|---------|--------|---------|---------|---------|---------|----|
| 1  |         |        |         |         |         |         | V    | 1365.8  | 683.4  | 674.4   | 674.89  | 1347.79 | 1348.77 | 12 |
| 2  | 201.12  |        |         |         | 183.11  |         | T    | 1266.73 | 633.87 | 624.86  | 625.35  | 1248.72 | 1249.7  | 11 |
| 3  | 314.21  |        |         |         | 296.2   |         | I    | 1165.68 | 583.34 | 574.34  | 574.83  | 1147.67 | 1148.65 | 10 |
| 4  | 445.25  |        |         |         | 427.24  |         | M    | 1052.6  | 526.8  | 517.8   | 518.29  | 1034.59 | 1035.57 | 9  |
| 5  | 542.3   |        |         |         | 524.29  |         | P    | 921.56  | 461.28 | 452.28  | 452.77  | 903.55  | 904.53  | 8  |
| 6  | 651.4   | 326.2  | 317.2   | 317.69  | 633.39  | 634.37  | K"   | 824.5   | 412.76 | 403.75  | 404.24  | 806.49  | 807.48  | 7  |
| 7  | 766.42  | 383.72 | 374.71  | 375.2   | 748.41  | 749.4   | D    | 715.41  | 358.21 | 349.2   | 349.69  | 697.4   | 698.38  | 6  |
| 8  | 879.51  | 440.26 | 431.25  | 431.74  | 861.5   | 862.48  | I    | 600.38  | 300.69 |         | 292.18  |         | 583.36  | 5  |
| 9  | 1007.57 | 504.29 | 495.28  | 495.77  | 989.56  | 990.54  | Q    | 487.3   |        |         |         |         | 470.27  | 4  |
| 10 | 1120.65 | 560.83 | 551.82  | 552.32  | 1102.64 | 1103.62 | L    | 359.24  |        |         |         |         | 342.21  | 3  |
| 11 | 1191.69 | 596.35 | 587.34  | 587.83  | 1173.68 | 1174.66 | A    | 246.16  |        |         |         |         | 229.13  | 2  |
| 12 |         |        |         |         |         |         | R    | 175.12  |        |         |         |         | 158.09  | 1  |

B6.

R.DAVTYTEHA.K (+2) - Mod : -19.00 at K(10) - Retention time : 33.81 min - Precursor m/z : 636.31 - Precursor int. : 13461.400 - Basepeak int. : 15857.700

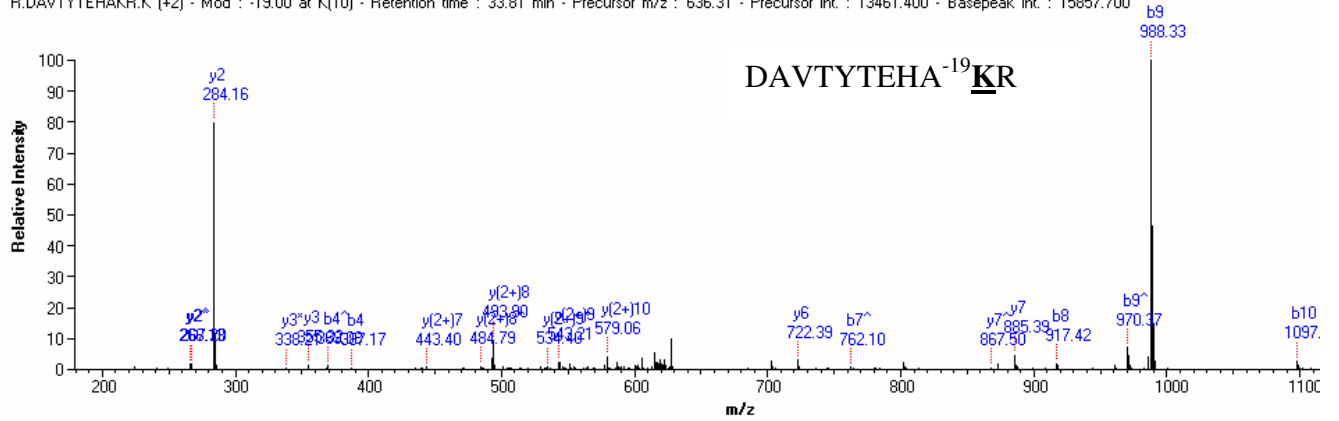

| #  | b       | b++    | b++-H2O | b++-NH3 | b-H2O   | b-NH3   | Seq. | y       | y++    | y++-H2O | y++-NH3 | y-H2O   | y-NH3   | #  |
|----|---------|--------|---------|---------|---------|---------|------|---------|--------|---------|---------|---------|---------|----|
| 1  |         |        |         |         |         |         | D    | 1271.64 | 636.33 | 627.32  | 627.81  | 1253.63 | 1254.62 | 11 |
| 2  | 187.07  |        |         |         | 169.06  |         | A    | 1156.62 | 578.81 | 569.81  | 570.3   | 1138.61 | 1139.59 | 10 |
| 3  | 286.14  |        |         |         | 268.13  |         | V    | 1085.58 | 543.29 | 534.29  | 534.78  | 1067.57 | 1068.55 | 9  |
| 4  | 387.19  |        |         |         | 369.18  |         | T    | 986.51  | 493.76 | 484.75  | 485.25  | 968.5   | 969.48  | 8  |
| 5  | 550.25  |        |         |         | 532.24  |         | Y    | 885.46  | 443.24 | 434.23  | 434.72  | 867.45  | 868.44  | 7  |
| 6  | 651.3   | 326.15 | 317.15  |         | 633.29  |         | T    | 722.4   | 361.7  | 352.7   | 353.19  | 704.39  | 705.37  | 6  |
| 7  | 780.34  | 390.67 | 381.67  |         | 762.33  |         | E    | 621.35  | 311.18 | 302.17  | 302.67  | 603.34  | 604.33  | 5  |
| 8  | 917.4   | 459.2  | 450.2   |         | 899.39  |         | H    | 492.31  |        |         |         |         | 475.28  | 4  |
| 9  | 988.44  | 494.72 | 485.72  |         | 970.43  |         | A    | 355.25  |        |         |         |         | 338.22  | 3  |
| 10 | 1097.53 | 549.27 | 540.26  | 540.76  | 1079.52 | 1080.51 | K"   | 284.21  |        |         |         |         | 267.19  | 2  |
| 11 |         |        |         |         |         |         | R    | 175.12  |        |         |         |         | 158.09  | 1  |

B7.

R.KTVTAMDVVYALKR.Q (+2) - Mod : -19.00 at K(13) - Retention time : 56.19 min - Precursor m/z : 788.94 - Precursor int. : 25762.000 - Basepeak int. : 6755.850

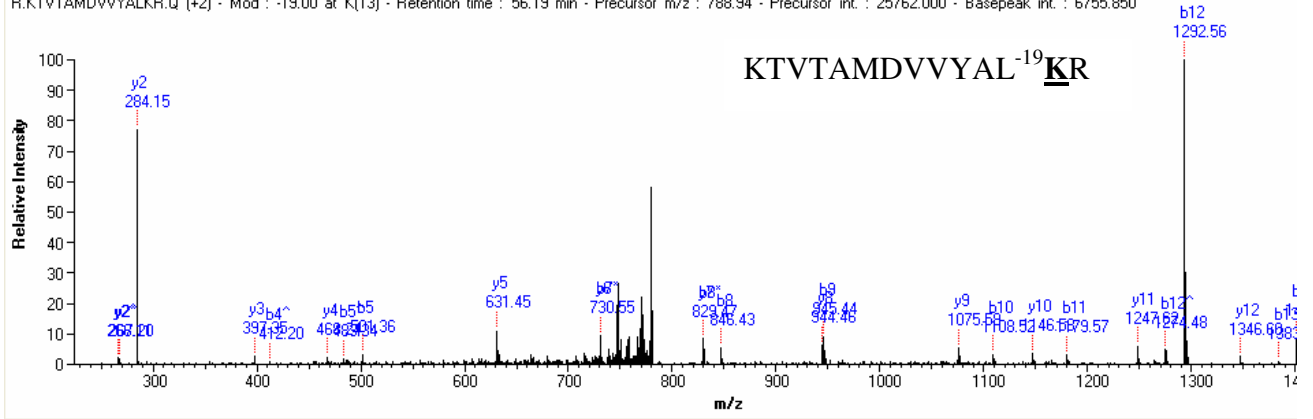

| #  | b       | b++    | b++-H2O | b++-NH3 | b-H2O   | b-NH3   | Seq. | y       | y++    | y++-H2O | y++-NH3 | y-H2O   | y-NH3   | #  |
|----|---------|--------|---------|---------|---------|---------|------|---------|--------|---------|---------|---------|---------|----|
| 1  |         |        |         |         |         |         | K    | 1575.9  | 788.45 | 779.45  | 779.94  | 1557.89 | 1558.87 | 14 |
| 2  | 230.15  |        |         |         | 212.14  | 213.12  | T    | 1447.8  | 724.41 | 715.4   | 715.89  | 1429.79 | 1430.78 | 13 |
| 3  | 329.22  |        |         |         | 311.21  | 312.19  | V    | 1346.76 | 673.88 | 664.88  | 665.37  | 1328.74 | 1329.73 | 12 |
| 4  | 430.27  |        |         |         | 412.26  | 413.24  | T    | 1247.69 | 624.35 | 615.34  | 615.83  | 1229.68 | 1230.66 | 11 |
| 5  | 501.3   |        |         |         | 483.29  | 484.28  | A    | 1146.64 | 573.82 | 564.82  | 565.31  | 1128.63 | 1129.61 | 10 |
| 6  | 632.34  | 316.68 | 307.67  | 308.16  | 614.33  | 615.32  | M    | 1075.6  | 538.3  | 529.3   | 529.79  | 1057.59 | 1058.58 | 9  |
| 7  | 747.37  | 374.19 | 365.18  | 365.68  | 729.36  | 730.34  | D    | 944.56  | 472.78 | 463.78  | 464.27  | 926.55  | 927.54  | 8  |
| 8  | 846.44  | 423.72 | 414.72  | 415.21  | 828.43  | 829.41  | V    | 829.53  | 415.27 |         | 406.76  |         | 812.51  | 7  |
| 9  | 945.51  | 473.26 | 464.25  | 464.74  | 927.5   | 928.48  | V    | 730.47  | 365.74 |         | 357.22  |         | 713.44  | 6  |
| 10 | 1108.57 | 554.79 | 545.78  | 546.28  | 1090.56 | 1091.54 | Y    | 631.4   | 316.2  |         | 307.69  |         | 614.37  | 5  |
| 11 | 1179.61 | 590.31 | 581.3   | 581.79  | 1161.6  | 1162.58 | A    | 468.33  |        |         |         |         | 451.31  | 4  |
| 12 | 1292.69 | 646.85 | 637.84  | 638.34  | 1274.68 | 1275.67 | L    | 397.3   |        |         |         |         | 380.27  | 3  |
| 13 | 1401.79 | 701.4  | 692.39  | 692.88  | 1383.78 | 1384.76 | K"   | 284.21  |        |         |         |         | 267.19  | 2  |
| 14 |         |        |         |         |         |         | R    | 175.12  |        |         |         |         | 158.09  | 1  |

C1.

R.M(+16)PC(+108)AEDYLSLILNR.L (+2) · Mod : 0.34 at 0(-1) · Retention time : 68.17 min · Precursor m/z : 881.57 · Precursor int. : 6317.970 · Basepeak int. : 2789.150

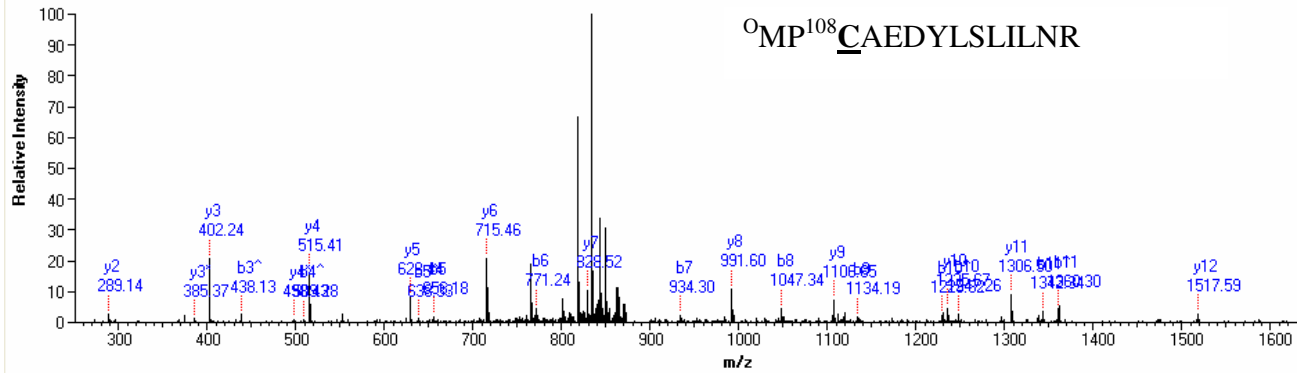

| #  | b       | b++    | b++-H2O | b++-NH3 | b-H2O   | b-NH3   | Seq. | y       | y++    | y++-H2O | y++-NH3 | y-H2O   | y-NH3   | #  |
|----|---------|--------|---------|---------|---------|---------|------|---------|--------|---------|---------|---------|---------|----|
| 1  |         |        |         |         |         |         | M    | 1761.8  | 881.4  | 872.4   | 872.89  | 1743.79 | 1744.78 | 14 |
| 2  | 245.1   |        |         |         |         |         | P    | 1614.76 | 807.88 | 798.88  | 799.37  | 1596.75 | 1597.73 | 13 |
| 3  | 456.11  |        |         |         |         |         | C"   | 1517.71 | 759.36 | 750.35  | 750.84  | 1499.7  | 1500.68 | 12 |
| 4  | 527.15  |        |         |         |         |         | A    | 1306.7  | 653.85 | 644.85  | 645.34  | 1288.69 | 1289.67 | 11 |
| 5  | 656.19  | 328.6  | 319.59  |         | 638.18  |         | E    | 1235.66 | 618.33 | 609.33  | 609.82  | 1217.65 | 1218.64 | 10 |
| 6  | 771.22  | 386.11 | 377.11  |         | 753.21  |         | D    | 1106.62 | 553.81 | 544.81  | 545.3   | 1088.61 | 1089.59 | 9  |
| 7  | 934.28  | 467.64 | 458.64  |         | 916.27  |         | Y    | 991.59  | 496.3  | 487.29  | 487.79  | 973.58  | 974.57  | 8  |
| 8  | 1047.36 | 524.19 | 515.18  |         | 1029.35 |         | L    | 828.53  | 414.77 | 405.76  | 406.26  | 810.52  | 811.5   | 7  |
| 9  | 1134.4  | 567.7  | 558.7   |         | 1116.39 |         | S    | 715.45  | 358.23 | 349.22  | 349.71  | 697.43  | 698.42  | 6  |
| 10 | 1247.48 | 624.24 | 615.24  |         | 1229.47 |         | L    | 628.41  | 314.71 |         | 306.2   |         | 611.39  | 5  |
| 11 | 1360.56 | 680.79 | 671.78  |         | 1342.55 |         | I    | 515.33  |        |         |         |         | 498.3   | 4  |
| 12 | 1473.65 | 737.33 | 728.32  |         | 1455.64 |         | L    | 402.25  |        |         |         |         | 385.22  | 3  |
| 13 | 1587.69 | 794.35 | 785.34  | 785.84  | 1569.68 | 1570.66 | N    | 289.16  |        |         |         |         | 272.13  | 2  |
| 14 |         |        |         |         |         |         | R    | 175.12  |        |         |         |         | 158.09  | 1  |

C2.

K.LKPDPTLC(+108)DEFK.A (+2) - Mod : 1.94 at 0(-1) - Retention time : 51.65 min - Precursor m/z : 815.35 - Precursor int. : 18631.100 - Basepeak int. : 3937.330

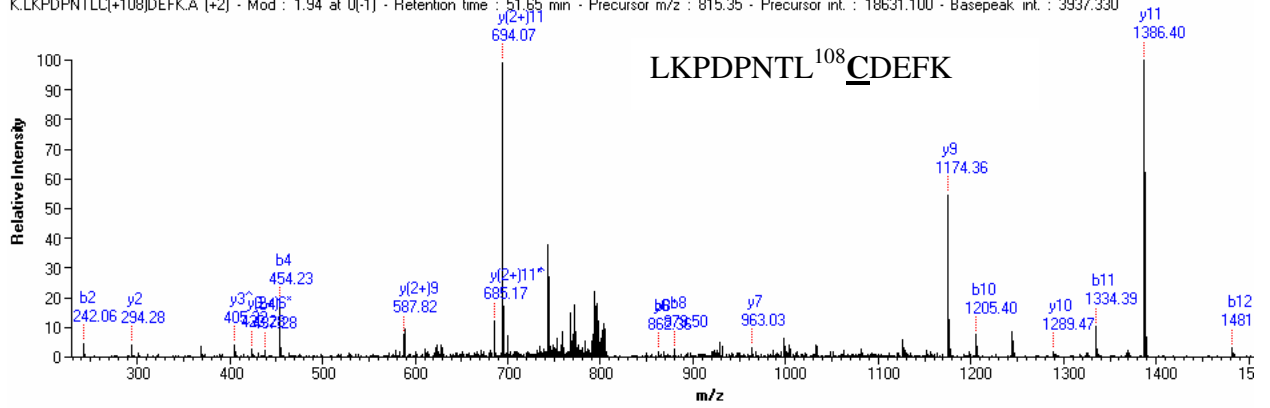

| #  | b       | b++    | b+++H2O | b+++NH3 | b-H2O   | b-NH3   | Seq. | y       | y++    | y+++H2O | y+++NH3 | y-H2O   | y-NH3   | #  |
|----|---------|--------|---------|---------|---------|---------|------|---------|--------|---------|---------|---------|---------|----|
| 1  |         |        |         |         |         |         | L    | 1627.75 | 814.38 | 805.37  | 805.86  | 1609.74 | 1610.72 | 13 |
| 2  | 242.19  |        |         |         |         | 225.16  | K    | 1514.66 | 757.83 | 748.83  | 749.32  | 1496.65 | 1497.64 | 12 |
| 3  | 339.24  |        |         |         |         | 322.21  | P    | 1386.57 | 693.79 | 684.78  | 685.27  | 1368.56 | 1369.54 | 11 |
| 4  | 454.27  |        |         |         | 436.26  | 437.24  | D    | 1289.51 | 645.26 | 636.26  | 636.75  | 1271.5  | 1272.49 | 10 |
| 5  | 551.32  |        |         |         | 533.31  | 534.29  | P    | 1174.49 | 587.75 | 578.74  | 579.23  | 1156.48 | 1157.46 | 9  |
| 6  | 665.36  | 333.18 | 324.18  | 324.67  | 647.35  | 648.34  | N    | 1077.43 | 539.22 | 530.22  | 530.71  | 1059.42 | 1060.41 | 8  |
| 7  | 766.41  | 383.71 | 374.7   | 375.2   | 748.4   | 749.36  | T    | 963.39  | 482.2  | 473.19  | 473.69  | 945.38  | 946.36  | 7  |
| 8  | 879.49  | 440.25 | 431.25  | 431.74  | 861.48  | 862.47  | L    | 862.34  | 431.68 | 422.67  | 423.16  | 844.33  | 845.32  | 6  |
| 9  | 1090.5  | 545.76 | 536.75  | 537.24  | 1072.49 | 1073.48 | C"   | 749.26  | 375.13 | 366.13  | 366.62  | 731.25  | 732.23  | 5  |
| 10 | 1205.53 | 603.27 | 594.26  | 594.76  | 1187.52 | 1188.5  | D    | 538.25  |        |         |         | 520.24  | 521.22  | 4  |
| 11 | 1334.57 | 667.79 | 658.78  | 659.28  | 1316.56 | 1317.55 | E    | 423.22  |        |         |         | 405.21  | 406.2   | 3  |
| 12 | 1481.64 | 741.32 | 732.32  | 732.81  | 1463.63 | 1464.61 | F    | 294.18  |        |         |         |         | 277.15  | 2  |
| 13 |         |        |         |         |         |         | K    | 147.11  |        |         |         |         | 130.09  | 1  |

C3.

K.LKEC(+108)CDKPLLEK.S (+3) - Mod : 1.15 at 0(-1) - Retention time : 38.19 min - Precursor m/z : 509.97 - Precursor int. : 4343.400 - Basepeak int. : 8463.640

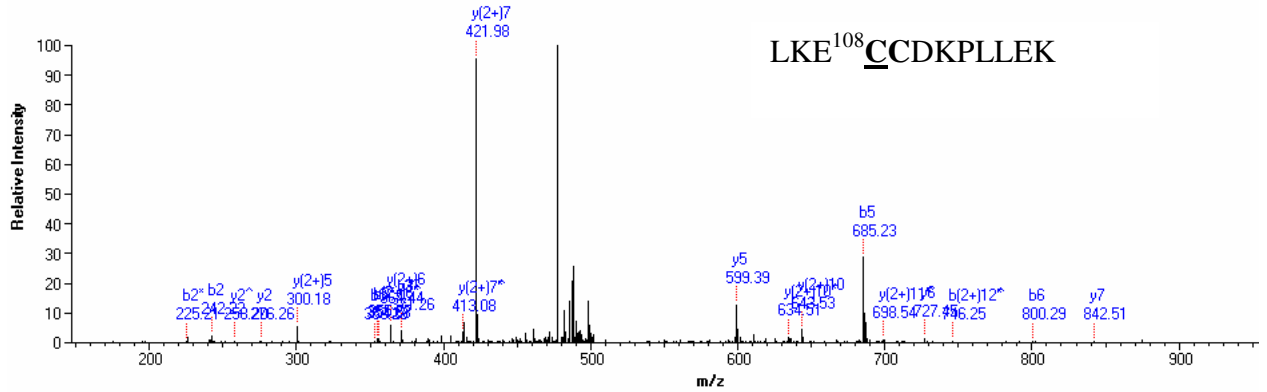

| #  | b       | b++    | b+++H2O | b+++NH3 | b-H2O   | b-NH3   | Seq. | y       | y++    | y+++H2O | y+++NH3 | y-H2O   | y-NH3   | #  |
|----|---------|--------|---------|---------|---------|---------|------|---------|--------|---------|---------|---------|---------|----|
| 1  |         |        |         |         |         |         | L    | 1526.74 | 763.87 | 754.87  | 755.36  | 1508.73 | 1509.71 | 12 |
| 2  | 242.19  |        |         |         |         | 225.16  | K    | 1413.65 | 707.33 | 698.33  | 698.82  | 1395.64 | 1396.63 | 11 |
| 3  | 371.23  |        |         |         | 353.22  | 354.2   | E    | 1285.56 | 643.28 | 634.28  | 634.77  | 1267.55 | 1268.53 | 10 |
| 4  | 582.24  |        |         |         | 564.23  | 565.21  | C"   | 1156.52 | 578.76 | 569.76  | 570.25  | 1138.51 | 1139.49 | 9  |
| 5  | 685.25  | 343.13 | 334.12  | 334.61  | 667.24  | 668.22  | C    | 945.51  | 473.26 | 464.25  | 464.74  | 927.5   | 928.48  | 8  |
| 6  | 800.27  | 400.64 | 391.64  | 392.13  | 782.26  | 783.25  | D    | 842.5   | 421.75 | 412.75  | 413.24  | 824.49  | 825.47  | 7  |
| 7  | 928.37  | 464.89 | 455.88  | 456.18  | 910.36  | 911.34  | K    | 727.47  | 364.24 | 355.23  | 355.73  | 709.46  | 710.44  | 6  |
| 8  | 1025.42 | 513.21 | 504.21  | 504.7   | 1007.41 | 1008.4  | P    | 599.38  |        |         |         | 581.37  | 582.35  | 5  |
| 9  | 1138.51 | 569.76 | 560.75  | 561.24  | 1120.5  | 1121.48 | L    | 502.32  |        |         |         | 484.31  | 485.3   | 4  |
| 10 | 1251.59 | 626.3  | 617.29  | 617.79  | 1233.58 | 1234.56 | L    | 389.24  |        |         |         | 371.23  | 372.21  | 3  |
| 11 | 1380.63 | 690.82 | 681.81  | 682.31  | 1362.62 | 1363.61 | E    | 276.15  |        |         |         | 258.14  | 259.13  | 2  |
| 12 |         |        |         |         |         |         | K    | 147.11  |        |         |         |         | 130.09  | 1  |

C4.

K.LKECC(+108)DKP<sup>108</sup>LLEK.S (+3) - Mod : 0.38 at 0(-1) - Retention time : 38.57 min - Precursor m/z : 509.71 - Precursor int. : 5839.170 - Basepeak int. : 6788.780

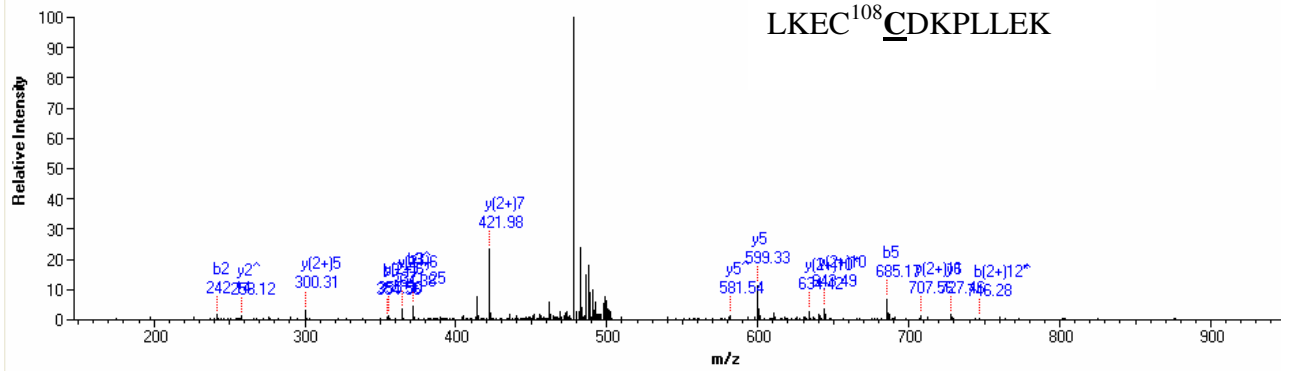

| #  | b       | b++    | b++-H2O | b++-NH3 | b-H2O   | b-NH3   | Seq. | y       | y++    | y++-H2O | y++-NH3 | y-H2O   | y-NH3   | #  |
|----|---------|--------|---------|---------|---------|---------|------|---------|--------|---------|---------|---------|---------|----|
| 1  |         |        |         |         |         |         | L    | 1526.74 | 763.87 | 754.87  | 755.36  | 1508.73 | 1509.71 | 12 |
| 2  | 242.19  |        |         |         |         | 225.16  | K    | 1413.65 | 707.33 | 698.33  | 698.82  | 1395.64 | 1396.63 | 11 |
| 3  | 371.23  |        |         |         | 353.22  | 354.2   | E    | 1285.56 | 643.28 | 634.28  | 634.77  | 1267.55 | 1268.53 | 10 |
| 4  | 474.24  |        |         |         | 456.23  | 457.21  | C    | 1156.52 | 578.76 | 569.76  | 570.25  | 1138.51 | 1139.49 | 9  |
| 5  | 685.25  | 343.13 | 334.12  | 334.61  | 667.24  | 668.22  | C"   | 1053.51 | 527.26 | 518.25  | 518.74  | 1035.5  | 1036.48 | 8  |
| 6  | 800.27  | 400.64 | 391.64  | 392.13  | 782.26  | 783.25  | D    | 842.5   | 421.75 | 412.75  | 413.24  | 824.49  | 825.47  | 7  |
| 7  | 928.37  | 464.69 | 455.68  | 456.18  | 910.36  | 911.34  | K    | 727.47  | 364.24 | 355.23  | 355.73  | 709.46  | 710.44  | 6  |
| 8  | 1025.42 | 513.21 | 504.21  | 504.7   | 1007.41 | 1008.4  | P    | 599.38  |        |         |         | 581.37  | 582.35  | 5  |
| 9  | 1138.51 | 569.76 | 560.75  | 561.24  | 1120.5  | 1121.48 | L    | 502.32  |        |         |         | 484.31  | 485.3   | 4  |
| 10 | 1251.59 | 626.3  | 617.29  | 617.79  | 1233.58 | 1234.56 | L    | 389.24  |        |         |         | 371.23  | 372.21  | 3  |
| 11 | 1380.63 | 690.82 | 681.81  | 682.31  | 1362.62 | 1363.61 | E    | 276.15  |        |         |         | 258.14  | 259.13  | 2  |
| 12 |         |        |         |         |         |         | K    | 147.11  |        |         |         |         | 130.09  | 1  |



C5.

K.DDPHAC(+108)YSTVF $\underline{C}$ L(+3) - Mod : 2.30 at 0(-1) - Retention time : 48.05 min - Precursor m/z : 536.65 - Precursor int. : 27658.600 - Basepeak int. : 81903.800

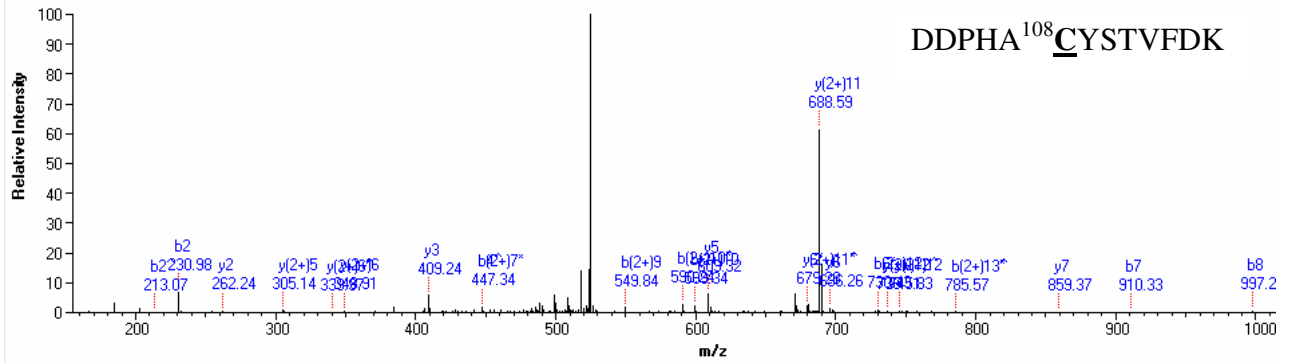

| #  | b       | b++    | b++-H2O | b-H2O   | Seq. | y       | y++    | y++-H2O | y++-NH3 | y-H2O   | y-NH3   | #  |
|----|---------|--------|---------|---------|------|---------|--------|---------|---------|---------|---------|----|
| 1  |         |        |         |         | D    | 1605.63 | 803.32 | 794.31  | 794.81  | 1587.62 | 1588.6  | 13 |
| 2  | 231.06  |        |         | 213.05  | D    | 1490.6  | 745.81 | 736.8   | 737.29  | 1472.59 | 1473.58 | 12 |
| 3  | 328.11  |        |         | 310.1   | P    | 1375.58 | 688.29 | 679.29  | 679.78  | 1357.57 | 1358.55 | 11 |
| 4  | 465.17  |        |         | 447.16  | H    | 1278.52 | 639.77 | 630.76  | 631.25  | 1260.51 | 1261.5  | 10 |
| 5  | 536.21  |        |         | 518.2   | A    | 1141.47 | 571.24 | 562.23  | 562.72  | 1123.45 | 1124.44 | 9  |
| 6  | 747.22  | 374.11 | 365.11  | 729.21  | C"   | 1070.43 | 535.72 | 526.71  | 527.2   | 1052.42 | 1053.4  | 8  |
| 7  | 910.28  | 455.65 | 446.64  | 892.27  | Y    | 859.42  | 430.21 | 421.21  | 421.7   | 841.41  | 842.39  | 7  |
| 8  | 997.32  | 499.16 | 490.16  | 979.3   | S    | 696.36  | 348.68 | 339.68  | 340.17  | 678.35  | 679.33  | 6  |
| 9  | 1098.36 | 549.68 | 540.68  | 1080.35 | T    | 609.32  | 305.17 | 296.16  | 296.65  | 591.31  | 592.3   | 5  |
| 10 | 1197.43 | 599.22 | 590.21  | 1179.42 | V    | 508.28  |        |         |         | 490.27  | 491.25  | 4  |
| 11 | 1344.5  | 672.75 | 663.75  | 1326.49 | F    | 409.21  |        |         |         | 391.2   | 392.18  | 3  |
| 12 | 1459.53 | 730.27 | 721.26  | 1441.52 | D    | 262.14  |        |         |         | 244.13  | 245.11  | 2  |
| 13 |         |        |         |         | K    | 147.11  |        |         |         |         | 130.09  | 1  |

C6.

K.QNC(+108)DQFEK.L (+2) - Mod : 0.56 at 0(-1) - Retention time : 13.90 min - Precursor m/z : 560.49 - Precursor int. : 828920.000 - Basepeak int. : 1169110.000

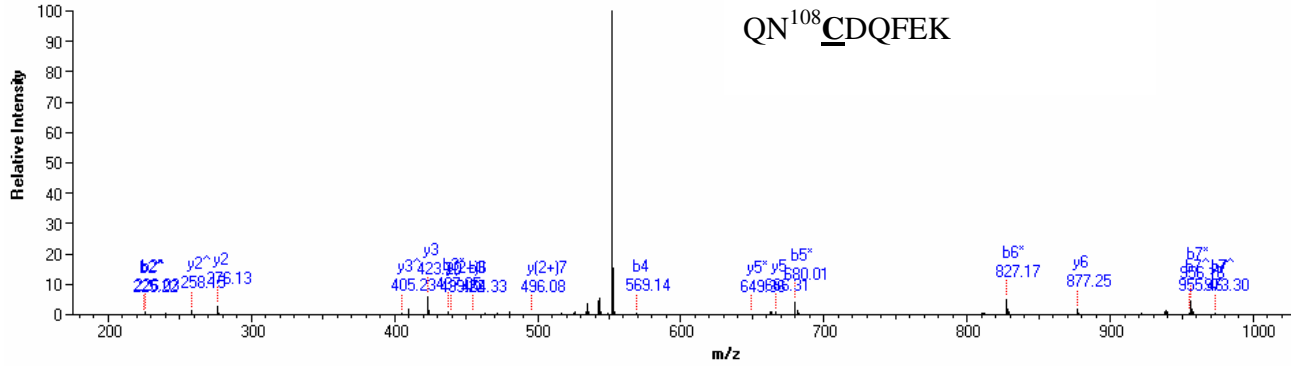

| # | b      | b++    | b++-H2O | b++-NH3 | b-H2O  | b-NH3  | Seq. | y       | y++    | y++-H2O | y++-NH3 | y-H2O   | y-NH3   | # |
|---|--------|--------|---------|---------|--------|--------|------|---------|--------|---------|---------|---------|---------|---|
| 1 |        |        |         |         |        |        | Q    | 1119.42 | 560.21 | 551.21  | 551.7   | 1101.41 | 1102.39 | 8 |
| 2 | 243.11 |        |         |         |        | 226.08 | N    | 991.36  | 496.18 | 487.18  | 487.67  | 973.35  | 974.33  | 7 |
| 3 | 454.12 |        |         |         |        | 437.09 | C"   | 877.32  | 439.16 | 430.16  | 430.65  | 859.31  | 860.29  | 6 |
| 4 | 569.15 |        |         |         | 551.13 | 552.12 | D    | 666.31  | 333.66 | 324.65  | 325.14  | 648.3   | 649.28  | 5 |
| 5 | 697.2  | 349.11 | 340.1   | 340.59  | 679.19 | 680.18 | Q    | 551.28  |        |         |         | 533.27  | 534.26  | 4 |
| 6 | 844.27 | 422.64 | 413.63  | 414.13  | 826.26 | 827.25 | F    | 423.22  |        |         |         | 405.21  | 406.2   | 3 |
| 7 | 973.32 | 487.16 | 478.16  | 478.65  | 955.3  | 956.29 | E    | 276.15  |        |         |         | 258.14  | 259.13  | 2 |
| 8 |        |        |         |         |        |        | K    | 147.11  |        |         |         |         | 130.09  | 1 |

C7.

K.VGTRC(+108)CTKPESER.M (+3) - Mod : 2.38 at 0(-1) - Retention time : 4.68 min - Precursor m/z : 526.03 - Precursor int. : 23071.000 - Basepeak int. : 16371.700

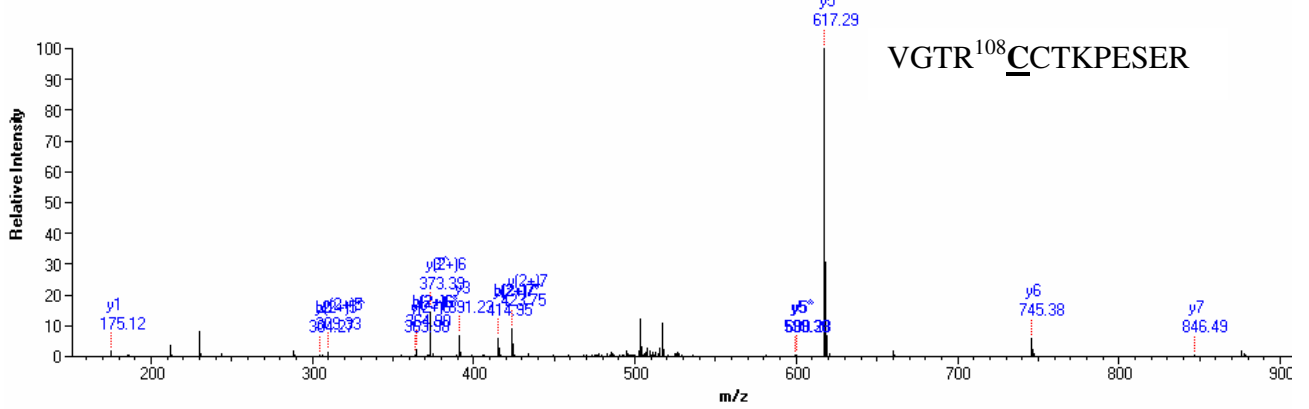

| #  | b       | b++    | b++-H2O | b++-NH3 | b-H2O   | b-NH3   | Seq. | y       | y++    | y++-H2O | y++-NH3 | y-H2O   | y-NH3   | #  |
|----|---------|--------|---------|---------|---------|---------|------|---------|--------|---------|---------|---------|---------|----|
| 1  |         |        |         |         |         |         | V    | 1573.69 | 787.35 | 778.34  | 778.83  | 1555.68 | 1556.66 | 13 |
| 2  | 157.1   |        |         |         |         |         | G    | 1474.62 | 737.81 | 728.81  | 729.3   | 1456.61 | 1457.59 | 12 |
| 3  | 258.15  |        |         |         | 240.13  |         | T    | 1417.6  | 709.3  | 700.3   | 700.79  | 1399.59 | 1400.57 | 11 |
| 4  | 414.25  |        |         |         | 396.24  | 397.22  | R    | 1316.55 | 658.78 | 649.77  | 650.27  | 1298.54 | 1299.52 | 10 |
| 5  | 625.26  | 313.13 | 304.13  | 304.62  | 607.25  | 608.23  | C"   | 1160.45 | 580.73 | 571.72  | 572.22  | 1142.44 | 1143.42 | 9  |
| 6  | 728.26  | 364.64 | 355.63  | 356.12  | 710.25  | 711.24  | C    | 949.44  | 475.22 | 466.22  | 466.71  | 931.43  | 932.41  | 8  |
| 7  | 829.31  | 415.16 | 406.15  | 406.65  | 811.3   | 812.29  | T    | 846.43  | 423.72 | 414.71  | 415.21  | 828.42  | 829.4   | 7  |
| 8  | 957.41  | 479.21 | 470.2   | 470.69  | 939.4   | 940.38  | K    | 745.38  | 373.2  | 364.19  | 364.68  | 727.37  | 728.36  | 6  |
| 9  | 1054.46 | 527.73 | 518.73  | 519.22  | 1036.45 | 1037.43 | P    | 617.29  | 309.15 | 300.14  | 300.63  | 599.28  | 600.26  | 5  |
| 10 | 1183.5  | 592.26 | 583.25  | 583.74  | 1165.49 | 1166.48 | E    | 520.24  |        |         |         | 502.23  | 503.21  | 4  |
| 11 | 1270.53 | 635.77 | 626.77  | 627.26  | 1252.52 | 1253.51 | S    | 391.19  |        |         |         | 373.18  | 374.17  | 3  |
| 12 | 1399.58 | 700.29 | 691.29  | 691.78  | 1381.57 | 1382.55 | E    | 304.16  |        |         |         | 286.15  | 287.13  | 2  |
| 13 |         |        |         |         |         |         | R    | 175.12  |        |         |         |         | 158.09  | 1  |

C8.

K.VGTRCC(+108)TKPESER.M (+3) - Mod : 3.00 at 0(-1) - Retention time : 4.33 min - Precursor m/z : 526.23 - Precursor int. : 4575.280 - Basepeak int. : 3145.350

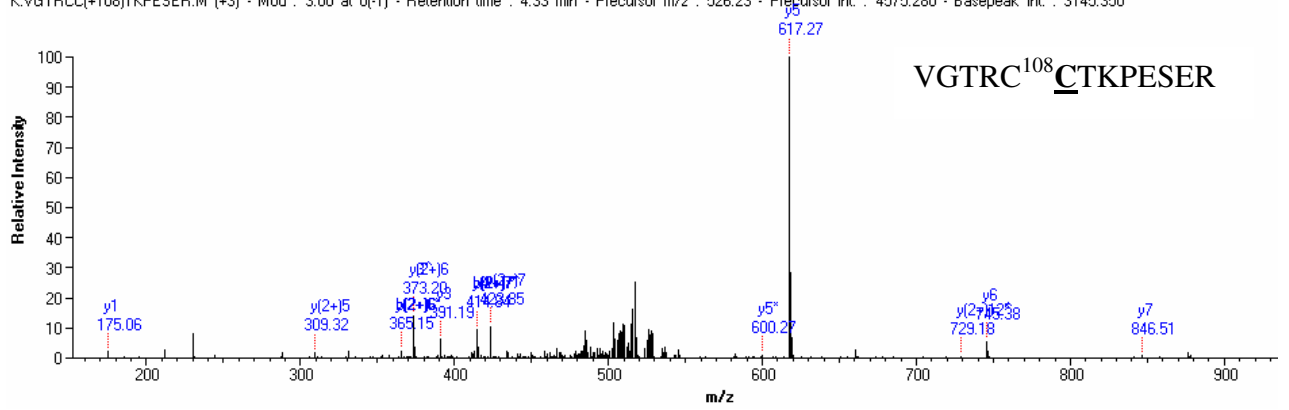

| #  | b       | b++    | b+++H2O | b+++NH3 | b-H2O   | b-NH3   | Seq. | y       | y++    | y+++H2O | y+++NH3 | y-H2O   | y-NH3   | #  |
|----|---------|--------|---------|---------|---------|---------|------|---------|--------|---------|---------|---------|---------|----|
| 1  |         |        |         |         |         |         | V    | 1573.69 | 787.35 | 778.34  | 778.83  | 1555.68 | 1556.66 | 13 |
| 2  | 157.1   |        |         |         |         |         | G    | 1474.62 | 737.81 | 728.81  | 729.3   | 1456.61 | 1457.59 | 12 |
| 3  | 258.15  |        |         |         | 240.13  |         | T    | 1417.6  | 709.3  | 700.3   | 700.79  | 1399.59 | 1400.57 | 11 |
| 4  | 414.25  |        |         |         | 396.24  | 397.22  | R    | 1316.55 | 658.78 | 649.77  | 650.27  | 1298.54 | 1299.52 | 10 |
| 5  | 517.26  |        |         |         | 499.25  | 500.23  | C    | 1160.45 | 580.73 | 571.72  | 572.22  | 1142.44 | 1143.42 | 9  |
| 6  | 728.26  | 364.64 | 355.63  | 356.12  | 710.25  | 711.24  | C"   | 1057.44 | 529.22 | 520.22  | 520.71  | 1039.43 | 1040.41 | 8  |
| 7  | 829.31  | 415.16 | 406.15  | 406.65  | 811.3   | 812.29  | T    | 846.43  | 423.72 | 414.71  | 415.21  | 828.42  | 829.4   | 7  |
| 8  | 957.41  | 479.21 | 470.2   | 470.69  | 939.4   | 940.38  | K    | 745.38  | 373.2  | 364.19  | 364.68  | 727.37  | 728.36  | 6  |
| 9  | 1054.46 | 527.73 | 518.73  | 519.22  | 1036.45 | 1037.43 | P    | 617.29  | 309.15 | 300.14  | 300.63  | 599.28  | 600.26  | 5  |
| 10 | 1183.5  | 592.26 | 583.25  | 583.74  | 1166.49 | 1166.48 | E    | 520.24  |        |         |         | 502.23  | 503.21  | 4  |
| 11 | 1270.53 | 635.77 | 626.77  | 627.26  | 1252.52 | 1253.51 | S    | 391.19  |        |         |         | 373.18  | 374.17  | 3  |
| 12 | 1399.58 | 700.29 | 691.29  | 691.78  | 1381.57 | 1382.55 | E    | 304.16  |        |         |         | 286.15  | 287.13  | 2  |
| 13 |         |        |         |         |         |         | R    | 175.12  |        |         |         |         | 158.09  | 1  |

C9.

R.M(+16)PC(+108)AEDYLSLILNR.L (+2) - Mod : 0.34 at 0(-1) - Retention time : 68.17 min - Precursor m/z : 881.57 - Precursor int. : 6317.970 - Basepeak int. : 2789.150

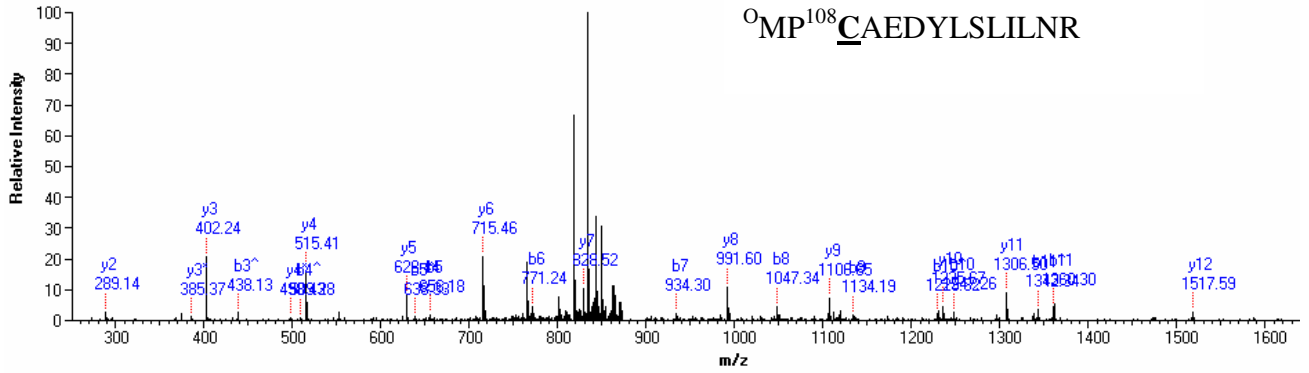

| #  | b       | b++    | b++-H2O | b++-NH3 | b-H2O   | b-NH3   | Seq. | y       | y++    | y++-H2O | y++-NH3 | y-H2O   | y-NH3   | #  |
|----|---------|--------|---------|---------|---------|---------|------|---------|--------|---------|---------|---------|---------|----|
| 1  |         |        |         |         |         |         | M    | 1761.8  | 881.4  | 872.4   | 872.89  | 1743.79 | 1744.78 | 14 |
| 2  | 245.1   |        |         |         |         |         | P    | 1614.76 | 807.88 | 798.88  | 799.37  | 1596.75 | 1597.73 | 13 |
| 3  | 456.11  |        |         |         |         |         | C    | 1517.71 | 759.36 | 750.35  | 750.84  | 1499.7  | 1500.68 | 12 |
| 4  | 527.15  |        |         |         |         |         | A    | 1306.7  | 653.85 | 644.85  | 645.34  | 1288.69 | 1289.67 | 11 |
| 5  | 656.19  | 328.6  | 319.59  |         | 638.18  |         | E    | 1235.66 | 618.33 | 609.33  | 609.82  | 1217.65 | 1218.64 | 10 |
| 6  | 771.22  | 386.11 | 377.11  |         | 753.21  |         | D    | 1106.62 | 553.81 | 544.81  | 545.3   | 1088.61 | 1089.59 | 9  |
| 7  | 934.28  | 467.64 | 458.64  |         | 916.27  |         | Y    | 991.59  | 496.3  | 487.29  | 487.79  | 973.58  | 974.57  | 8  |
| 8  | 1047.36 | 524.19 | 515.18  |         | 1029.35 |         | L    | 828.53  | 414.77 | 405.76  | 406.26  | 810.52  | 811.5   | 7  |
| 9  | 1134.4  | 567.7  | 558.7   |         | 1116.39 |         | S    | 715.45  | 358.23 | 349.22  | 349.71  | 697.43  | 698.42  | 6  |
| 10 | 1247.48 | 624.24 | 615.24  |         | 1229.47 |         | L    | 628.41  | 314.71 |         | 306.2   |         | 611.39  | 5  |
| 11 | 1360.56 | 680.79 | 671.78  |         | 1342.55 |         | I    | 515.33  |        |         |         |         | 498.3   | 4  |
| 12 | 1473.65 | 737.33 | 728.32  |         | 1455.64 |         | L    | 402.25  |        |         |         |         | 385.22  | 3  |
| 13 | 1587.69 | 794.35 | 785.34  | 785.84  | 1569.68 | 1570.66 | N    | 289.16  |        |         |         |         | 272.13  | 2  |
| 14 |         |        |         |         |         |         | R    | 175.12  |        |         |         |         | 158.09  | 1  |

C10.

R.LC(+108)VLHEK.T (+3) - Mod : 1.57 at 0(-1) - Retention time : 15.12 min - Precursor m/z : 317.68 - Precursor int. : 69543.900 - Basepeak int. : 89018.700

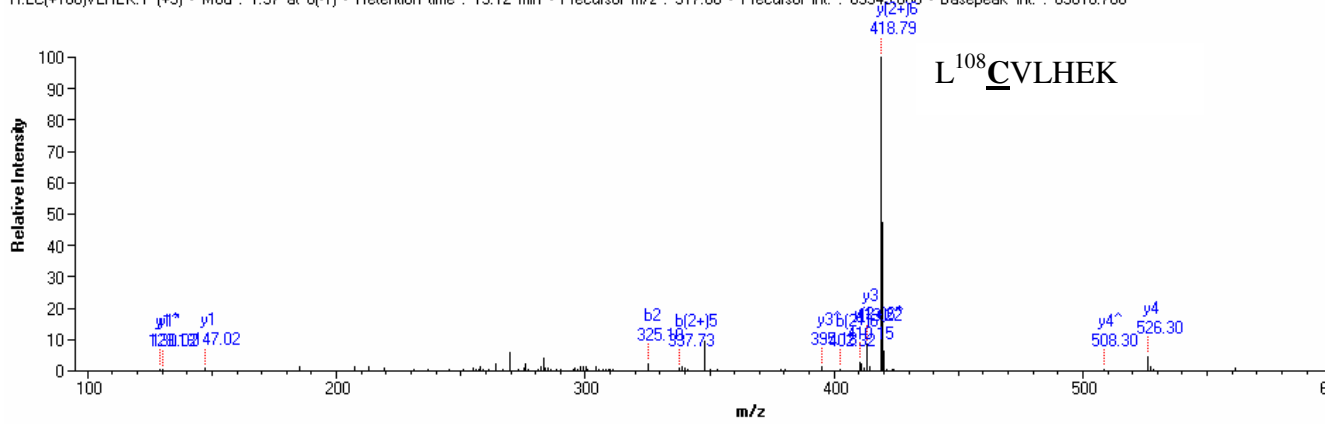

| # | b      | b++    | b+++ - H2O | b - H2O | Seq.           | y      | y++    | y+++ - H2O | y+++ - NH3 | y - H2O | y - NH3 | # |
|---|--------|--------|------------|---------|----------------|--------|--------|------------|------------|---------|---------|---|
| 1 |        |        |            |         | L              | 949.46 | 475.23 | 466.23     | 466.72     | 931.45  | 932.43  | 7 |
| 2 | 325.1  |        |            |         | C <sup>u</sup> | 836.38 | 418.69 | 409.69     | 410.18     | 818.36  | 819.35  | 6 |
| 3 | 424.17 |        |            |         | V              | 625.37 | 313.19 | 304.18     | 304.67     | 607.36  | 608.34  | 5 |
| 4 | 537.25 |        |            |         | L              | 526.3  |        |            |            | 508.29  | 509.27  | 4 |
| 5 | 674.31 | 337.66 |            |         | H              | 413.21 |        |            |            | 395.2   | 396.19  | 3 |
| 6 | 803.36 | 402.18 | 393.18     | 785.34  | E              | 276.15 |        |            |            | 258.14  | 259.13  | 2 |
| 7 |        |        |            |         | K              | 147.11 |        |            |            |         | 130.09  | 1 |

C11.

R.RPC(+108)FSALTPDETYVPK.A (+3) - Mod : 2.62 at 0(-1) - Retention time : 49.07 min - Precursor m/z : 645.51 - Precursor int. : 678263.000 - Basepeak int. : 90640.800

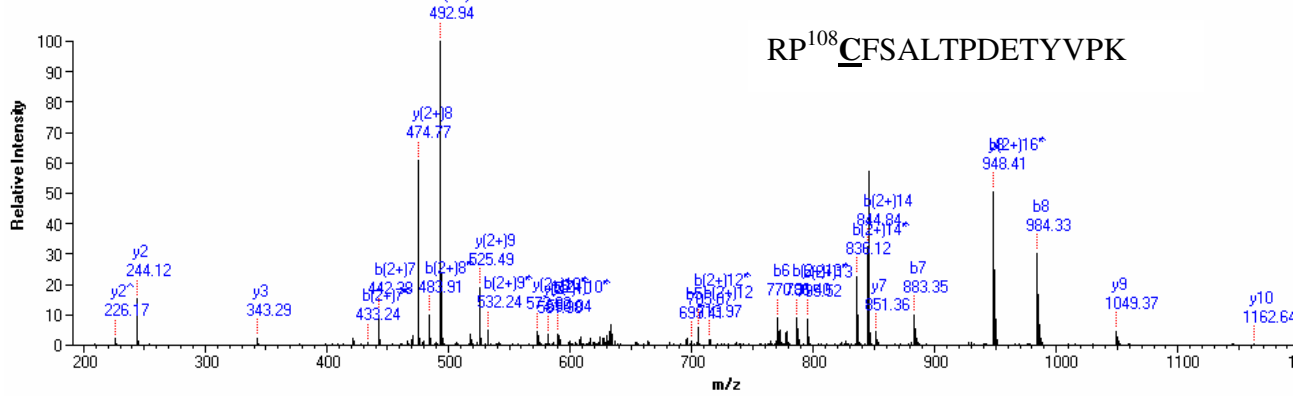

| #  | b       | b++    | b+++H2O | b+++NH3 | b-H2O   | b-NH3   | Seq. | y       | y++    | y+++H2O | y+++NH3 | y-H2O   | y-NH3   | #  |
|----|---------|--------|---------|---------|---------|---------|------|---------|--------|---------|---------|---------|---------|----|
| 1  |         |        |         |         |         |         | R    | 1931.9  | 966.45 | 957.45  | 957.94  | 1913.89 | 1914.87 | 16 |
| 2  | 254.16  |        |         |         |         | 237.14  | P    | 1775.8  | 888.4  | 879.4   | 879.89  | 1757.79 | 1758.77 | 15 |
| 3  | 465.17  |        |         |         |         | 448.14  | C"   | 1678.75 | 839.88 | 830.87  | 831.36  | 1660.73 | 1661.72 | 14 |
| 4  | 612.24  | 306.62 |         | 298.11  |         | 595.21  | F    | 1467.74 | 734.37 | 725.37  | 725.86  | 1449.73 | 1450.71 | 13 |
| 5  | 699.27  | 350.14 | 341.13  | 341.63  | 681.26  | 682.24  | S    | 1320.67 | 660.84 | 651.83  | 652.32  | 1302.66 | 1303.64 | 12 |
| 6  | 770.31  | 385.66 | 376.65  | 377.14  | 752.3   | 753.28  | A    | 1233.64 | 617.32 | 608.32  | 608.81  | 1215.63 | 1216.61 | 11 |
| 7  | 883.39  | 442.2  | 433.19  | 433.69  | 865.38  | 866.37  | L    | 1162.6  | 581.8  | 572.8   | 573.29  | 1144.59 | 1145.57 | 10 |
| 8  | 984.44  | 492.72 | 483.72  | 484.21  | 966.43  | 967.41  | T    | 1049.51 | 525.26 | 516.26  | 516.75  | 1031.5  | 1032.49 | 9  |
| 9  | 1081.49 | 541.25 | 532.24  | 532.74  | 1063.48 | 1064.47 | P    | 948.47  | 474.74 | 465.73  | 466.22  | 930.46  | 931.44  | 8  |
| 10 | 1196.52 | 598.76 | 589.76  | 590.25  | 1178.51 | 1179.49 | D    | 851.41  | 426.21 | 417.21  | 417.7   | 833.4   | 834.39  | 7  |
| 11 | 1325.56 | 663.28 | 654.28  | 654.77  | 1307.55 | 1308.54 | E    | 736.39  | 368.7  | 359.69  | 360.18  | 718.38  | 719.36  | 6  |
| 12 | 1426.61 | 713.81 | 704.8   | 705.3   | 1408.6  | 1409.58 | T    | 607.34  | 304.18 | 295.17  | 295.66  | 589.33  | 590.32  | 5  |
| 13 | 1589.67 | 795.34 | 786.34  | 786.83  | 1571.66 | 1572.65 | Y    | 506.3   |        |         |         |         | 489.27  | 4  |
| 14 | 1688.74 | 844.87 | 835.87  | 836.36  | 1670.73 | 1671.72 | V    | 343.23  |        |         |         |         | 326.21  | 3  |
| 15 | 1785.79 | 893.4  | 884.4   | 884.89  | 1767.78 | 1768.77 | P    | 244.17  |        |         |         |         | 227.14  | 2  |
| 16 |         |        |         |         |         |         | K    | 147.11  |        |         |         |         | 130.09  | 1  |

C12.

K.TCVADESHAGC(+108)JEK.S (+2) - Mod : 48.00 at C(2) - Retention time : 13.86 min - Precursor m/z : 753.99 - Precursor int. : 23369.500 - Basepeak int. : 2696.740

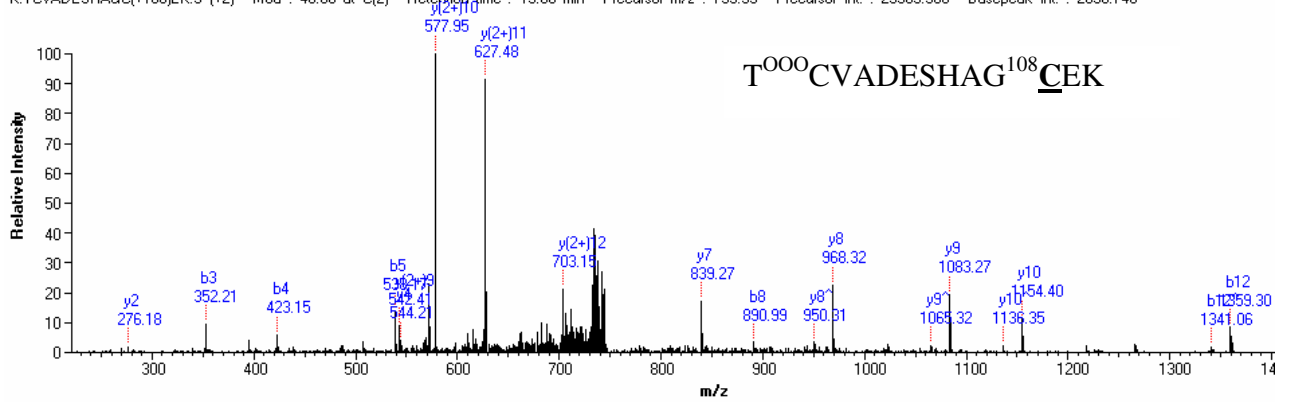

| #  | b       | b++    | b++-H2O | b-H2O   | Seq.  | y       | y++    | y++-H2O | y++-NH3 | y-H2O   | y-NH3   | #  |
|----|---------|--------|---------|---------|-------|---------|--------|---------|---------|---------|---------|----|
| 1  |         |        |         |         | T     | 1505.55 | 753.28 | 744.27  | 744.76  | 1487.54 | 1488.52 | 13 |
| 2  | 253.06  |        |         | 235.05  | C(48) | 1404.5  | 702.75 | 693.75  | 694.24  | 1386.49 | 1387.47 | 12 |
| 3  | 352.13  |        |         | 334.12  | V     | 1253.49 | 627.25 | 618.24  | 618.73  | 1235.48 | 1236.46 | 11 |
| 4  | 423.17  |        |         | 405.16  | A     | 1154.42 | 577.71 | 568.71  | 569.2   | 1136.41 | 1137.39 | 10 |
| 5  | 538.2   |        |         | 520.19  | D     | 1083.38 | 542.2  | 533.19  | 533.68  | 1065.37 | 1066.36 | 9  |
| 6  | 667.24  | 334.12 | 325.12  | 649.23  | E     | 968.36  | 484.68 | 475.68  | 476.17  | 950.35  | 951.33  | 8  |
| 7  | 754.27  | 377.64 | 368.63  | 736.26  | S     | 839.31  | 420.16 | 411.16  | 411.65  | 821.3   | 822.29  | 7  |
| 8  | 891.33  | 446.17 | 437.16  | 873.32  | H     | 752.28  | 376.64 | 367.64  | 368.13  | 734.27  | 735.25  | 6  |
| 9  | 962.37  | 481.69 | 472.68  | 944.36  | A     | 615.22  | 308.11 | 299.11  | 299.6   | 597.21  | 598.2   | 5  |
| 10 | 1019.39 | 510.2  | 501.19  | 1001.38 | G     | 544.19  |        |         |         | 526.17  | 527.16  | 4  |
| 11 | 1230.4  | 615.7  | 606.7   | 1212.39 | C"    | 487.16  |        |         |         | 469.15  | 470.14  | 3  |
| 12 | 1359.44 | 680.22 | 671.22  | 1341.43 | E     | 276.15  |        |         |         | 258.14  | 259.13  | 2  |
| 13 |         |        |         |         | K     | 147.11  |        |         |         |         | 130.09  | 1  |



C13.

K.YNGVFEQ(+108)CQAEK.G (+2) - Mod : 76.00 at C(9) - Retention time : 48.83 min - Precursor m/z : 909.93 - Precursor int. : 60411.600 - Basepeak int. : 14848.200

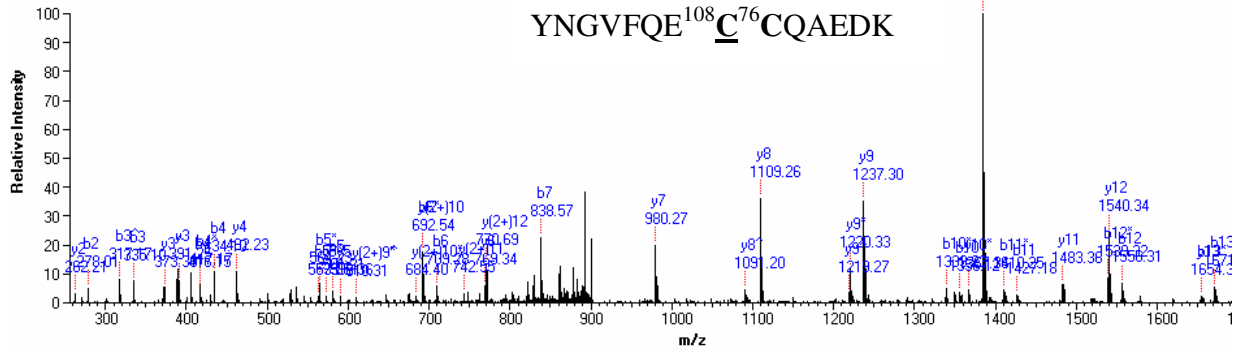

| #  | b       | b++    | b+++H2O | b+++NH3 | b-H2O   | b-NH3   | Seq.  | y       | y++    | y+++H2O | y+++NH3 | y-H2O   | y-NH3   | #  |
|----|---------|--------|---------|---------|---------|---------|-------|---------|--------|---------|---------|---------|---------|----|
| 1  |         |        |         |         |         |         | Y     | 1817.66 | 909.33 | 900.33  | 900.82  | 1799.65 | 1800.64 | 14 |
| 2  | 278.11  |        |         |         |         | 261.09  | N     | 1654.6  | 827.8  | 818.8   | 819.29  | 1636.59 | 1637.57 | 13 |
| 3  | 335.14  |        |         |         |         | 318.11  | G     | 1540.56 | 770.78 | 761.78  | 762.27  | 1522.54 | 1523.53 | 12 |
| 4  | 434.2   |        |         |         |         | 417.18  | V     | 1483.53 | 742.27 | 733.27  | 733.76  | 1465.52 | 1466.51 | 11 |
| 5  | 581.27  |        |         |         |         | 564.25  | F     | 1384.47 | 692.74 | 683.73  | 684.22  | 1366.45 | 1367.44 | 10 |
| 6  | 709.33  | 355.17 |         | 346.66  |         | 692.3   | Q     | 1237.4  | 619.2  | 610.2   | 610.69  | 1219.39 | 1220.37 | 9  |
| 7  | 838.37  | 419.69 | 410.69  | 411.18  | 820.36  | 821.35  | E     | 1109.34 | 555.17 | 546.17  | 546.66  | 1091.33 | 1092.31 | 8  |
| 8  | 1049.38 | 525.2  | 516.19  | 516.68  | 1031.37 | 1032.36 | C"    | 980.3   | 490.65 | 481.65  | 482.14  | 962.29  | 963.27  | 7  |
| 9  | 1228.39 | 614.7  | 605.69  | 606.19  | 1210.38 | 1211.37 | C(76) | 769.29  | 385.15 | 376.14  | 376.63  | 751.28  | 752.26  | 6  |
| 10 | 1356.45 | 678.73 | 669.72  | 670.22  | 1338.44 | 1339.42 | Q     | 590.28  |        |         |         | 572.27  | 573.25  | 5  |
| 11 | 1427.49 | 714.25 | 705.24  | 705.73  | 1409.48 | 1410.46 | A     | 462.22  |        |         |         | 444.21  | 445.19  | 4  |
| 12 | 1556.53 | 778.77 | 769.76  | 770.26  | 1538.52 | 1539.5  | E     | 391.18  |        |         |         | 373.17  | 374.16  | 3  |
| 13 | 1671.56 | 836.28 | 827.28  | 827.77  | 1653.55 | 1654.53 | D     | 262.14  |        |         |         | 244.13  | 245.11  | 2  |
| 14 |         |        |         |         |         |         | K     | 147.11  |        |         |         |         | 130.09  | 1  |

C14.

K.QNCI(+108)DQFEK.L (+2) - Mod : -17.00 at N(2) - Retention time : 40.77 min - Precursor m/z : 551.90 - Precursor int. : 56926.000 - Basepeak int. : 12381.700

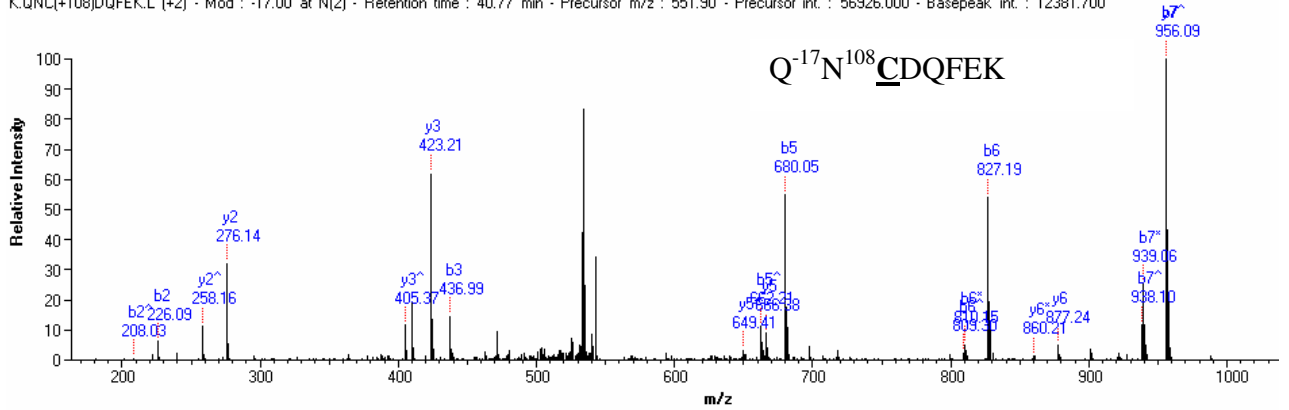

| # | b      | b++    | b+++H2O | b+++NH3 | b-H2O  | b-NH3  | Seq.   | y       | y++    | y++H2O | y++NH3 | y-H2O   | y-NH3   | # |
|---|--------|--------|---------|---------|--------|--------|--------|---------|--------|--------|--------|---------|---------|---|
| 1 |        |        |         |         |        |        | Q      | 1102.42 | 551.71 | 542.71 | 543.2  | 1084.41 | 1085.39 | 8 |
| 2 | 226.11 |        |         |         |        | 209.08 | N(-17) | 974.36  | 487.68 | 478.68 | 479.17 | 956.35  | 957.33  | 7 |
| 3 | 437.12 |        |         |         |        | 420.09 | C"     | 877.32  | 439.16 | 430.16 | 430.65 | 859.31  | 860.29  | 6 |
| 4 | 552.15 |        |         |         | 534.13 | 535.12 | D      | 666.31  | 333.66 | 324.65 | 325.14 | 648.3   | 649.28  | 5 |
| 5 | 680.2  | 340.61 | 331.6   | 332.09  | 662.19 | 663.18 | Q      | 551.28  |        |        |        | 533.27  | 534.26  | 4 |
| 6 | 827.27 | 414.14 | 405.13  | 405.63  | 809.26 | 810.25 | F      | 423.22  |        |        |        | 405.21  | 406.2   | 3 |
| 7 | 956.32 | 478.66 | 469.66  | 470.15  | 938.3  | 939.29 | E      | 276.15  |        |        |        | 258.14  | 259.13  | 2 |
| 8 |        |        |         |         |        |        | K      | 147.11  |        |        |        |         | 130.09  | 1 |

C15.

K.YIC(+108)DNQDTISSK.L (+2) - Mod : 1.00 at Q(6) - Retention time : 44.56 min - Precursor m/z : 748.38 - Precursor int. : 31833.700 - Basepeak int. : 2618.420

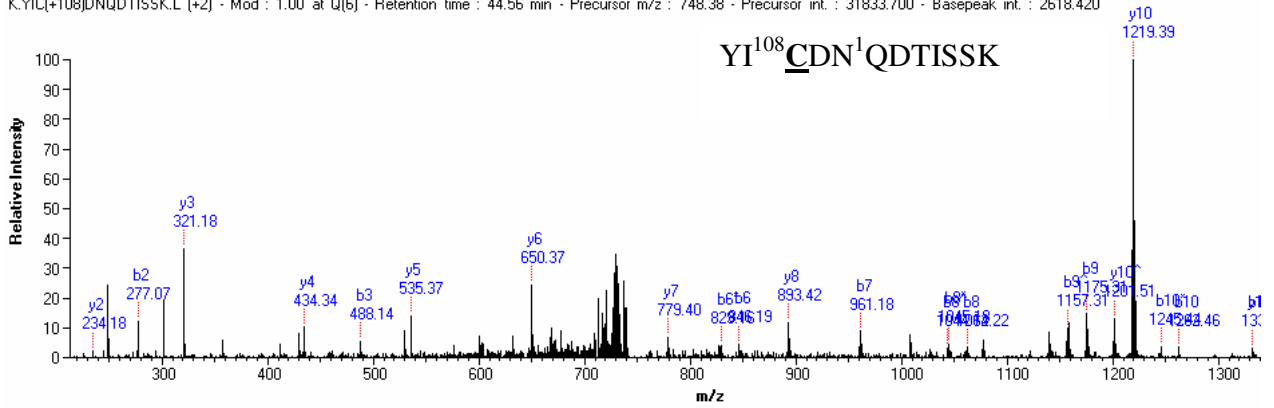

| #  | b       | b++    | b+++H2O | b+++NH3 | b-H2O   | b-NH3   | Seq. | y       | y++    | y++H2O | y++NH3 | y-H2O   | y-NH3   | #  |
|----|---------|--------|---------|---------|---------|---------|------|---------|--------|--------|--------|---------|---------|----|
| 1  |         |        |         |         |         |         | Y    | 1495.62 | 748.31 | 739.31 | 739.8  | 1477.61 | 1478.59 | 12 |
| 2  | 277.16  |        |         |         |         |         | I    | 1332.56 | 666.78 | 657.78 | 658.27 | 1314.55 | 1315.53 | 11 |
| 3  | 488.16  |        |         |         |         |         | C"   | 1219.47 | 610.24 | 601.23 | 601.73 | 1201.46 | 1202.45 | 10 |
| 4  | 603.19  | 302.1  | 293.09  |         | 585.18  |         | D    | 1008.46 | 504.74 | 495.73 | 496.22 | 990.45  | 991.44  | 9  |
| 5  | 717.23  | 359.12 | 350.12  | 350.61  | 699.22  | 700.21  | N    | 893.44  | 447.22 | 438.22 | 438.71 | 875.43  | 876.41  | 8  |
| 6  | 846.29  | 423.65 | 414.64  | 415.14  | 828.28  | 829.27  | Q(1) | 779.39  | 390.2  | 381.2  | 381.69 | 761.38  | 762.37  | 7  |
| 7  | 961.32  | 481.16 | 472.16  | 472.65  | 943.31  | 944.29  | D    | 650.33  | 325.67 | 316.67 | 317.16 | 632.32  | 633.31  | 6  |
| 8  | 1062.37 | 531.69 | 522.68  | 523.17  | 1044.36 | 1045.34 | T    | 535.31  |        |        |        | 517.3   | 518.28  | 5  |
| 9  | 1175.45 | 588.23 | 579.22  | 579.72  | 1157.44 | 1158.43 | I    | 434.26  |        |        |        | 416.25  | 417.23  | 4  |
| 10 | 1262.48 | 631.75 | 622.74  | 623.23  | 1244.47 | 1245.46 | S    | 321.18  |        |        |        | 303.17  | 304.15  | 3  |
| 11 | 1349.52 | 675.26 | 666.26  | 666.75  | 1331.51 | 1332.49 | S    | 234.14  |        |        |        | 216.13  | 217.12  | 2  |
| 12 |         |        |         |         |         |         | K    | 147.11  |        |        |        |         | 130.09  | 1  |

C16.

K.CCTESLVNR.R (+2) - Mod : 108.00 at C(1) - Retention time : 41.32 min - Precursor m/z : 566.95 - Precursor int. : 107184.000 - Basepeak int. : 24559.700

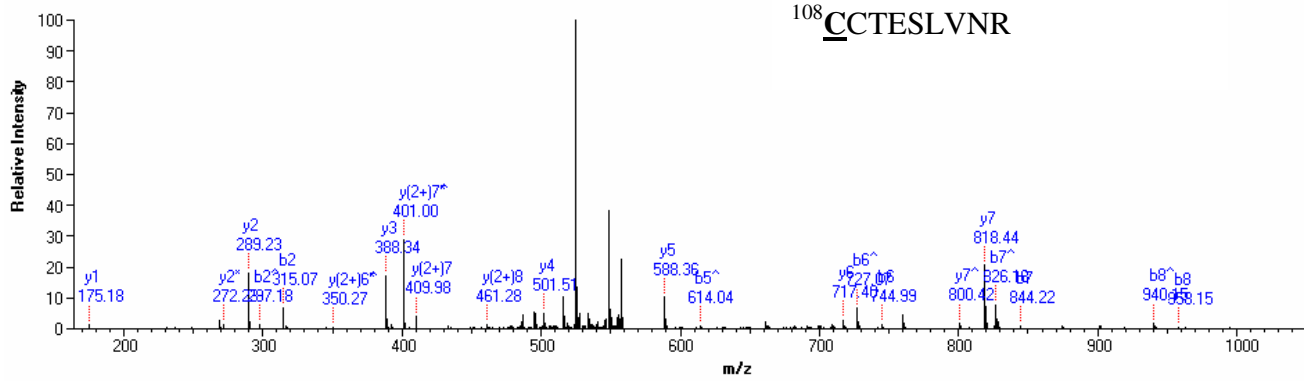

| # | b      | b++    | b+++H2O | b+++NH3 | b-H2O  | b-NH3  | Seq. | y       | y++    | y+++H2O | y+++NH3 | y-H2O   | y-NH3   | # |
|---|--------|--------|---------|---------|--------|--------|------|---------|--------|---------|---------|---------|---------|---|
| 1 |        |        |         |         |        |        | C"   | 1132.45 | 566.73 | 557.73  | 558.22  | 1114.44 | 1115.43 | 9 |
| 2 | 315.03 |        |         |         |        |        | C    | 921.45  | 461.23 | 452.22  | 452.71  | 903.43  | 904.42  | 8 |
| 3 | 416.07 |        |         |         | 398.06 |        | T    | 818.44  | 409.72 | 400.72  | 401.21  | 800.43  | 801.41  | 7 |
| 4 | 545.12 |        |         |         | 527.11 |        | E    | 717.39  | 359.2  | 350.19  | 350.68  | 699.38  | 700.36  | 6 |
| 5 | 632.15 | 316.58 | 307.57  |         | 614.14 |        | S    | 588.35  |        |         |         | 570.34  | 571.32  | 5 |
| 6 | 745.23 | 373.12 | 364.11  |         | 727.22 |        | L    | 501.31  |        |         |         |         | 484.29  | 4 |
| 7 | 844.3  | 422.65 | 413.65  |         | 826.29 |        | V    | 388.23  |        |         |         |         | 371.2   | 3 |
| 8 | 958.34 | 479.68 | 470.67  | 471.16  | 940.33 | 941.32 | N    | 289.16  |        |         |         |         | 272.13  | 2 |
| 9 |        |        |         |         |        |        | R    | 175.12  |        |         |         |         | 158.09  | 1 |

C17.

R.CCTKPESER.M (+2) - Mod : 108.00 at C(1) - Retention time : 5.33 min - Precursor m/z : 580.77 - Precursor int. : 6725.170 - Basepeak int. : 3173.300

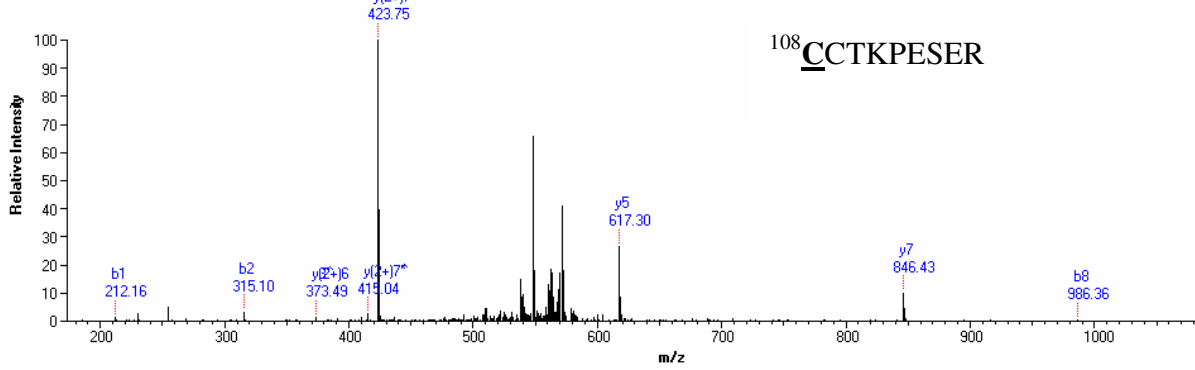

| # | b      | b++    | b+++H2O | b+++NH3 | b-H2O  | b-NH3  | Seq. | y       | y++    | y+++H2O | y+++NH3 | y-H2O   | y-NH3   | # |
|---|--------|--------|---------|---------|--------|--------|------|---------|--------|---------|---------|---------|---------|---|
| 1 |        |        |         |         |        |        | C"   | 1160.45 | 580.73 | 571.72  | 572.22  | 1142.44 | 1143.42 | 9 |
| 2 | 315.03 |        |         |         |        |        | C    | 949.44  | 475.22 | 466.22  | 466.71  | 931.43  | 932.41  | 8 |
| 3 | 416.07 |        |         |         | 398.06 |        | T    | 846.43  | 423.72 | 414.71  | 415.21  | 828.42  | 829.4   | 7 |
| 4 | 544.17 |        |         |         | 526.16 | 527.14 | K    | 745.38  | 373.2  | 364.19  | 364.68  | 727.37  | 728.36  | 6 |
| 5 | 641.22 | 321.11 | 312.11  | 312.6   | 623.21 | 624.2  | P    | 617.29  | 309.15 | 300.14  | 300.63  | 599.28  | 600.26  | 5 |
| 6 | 770.26 | 385.64 | 376.63  | 377.12  | 752.25 | 753.24 | E    | 520.24  |        |         |         | 502.23  | 503.21  | 4 |
| 7 | 857.3  | 429.15 | 420.15  | 420.64  | 839.29 | 840.27 | S    | 391.19  |        |         |         | 373.18  | 374.17  | 3 |
| 8 | 986.34 | 493.67 | 484.67  | 485.16  | 968.33 | 969.31 | E    | 304.16  |        |         |         | 286.15  | 287.13  | 2 |
| 9 |        |        |         |         |        |        | R    | 175.12  |        |         |         |         | 158.09  | 1 |

D1.

K.KQTALVELLKH (+1) · Mod : 74.00 at E(7) · Retention time : 36.25 min · Precursor m/z : 1216.55 · Precursor int. : 2392540.000 · Basepeak int. : 58088.800

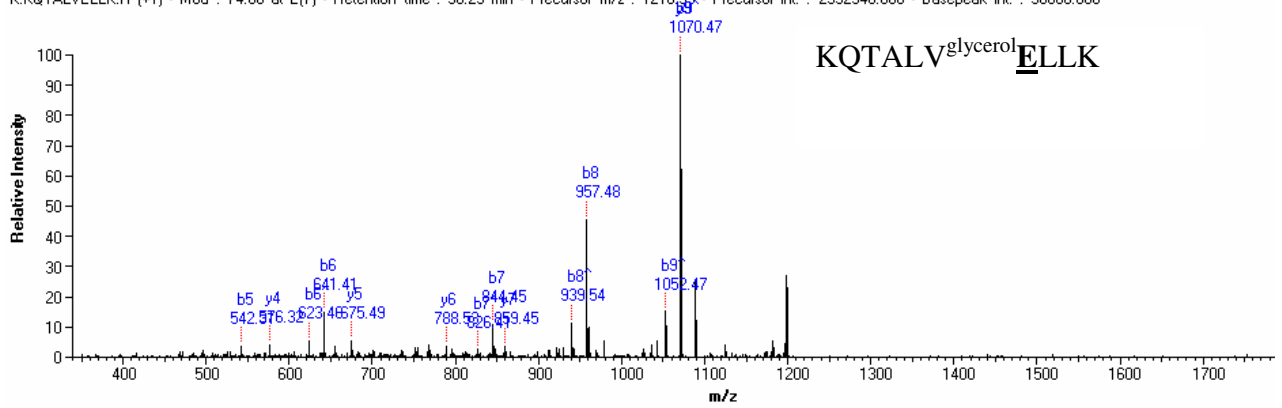

| #  | b       | b++    | b++-H2O | b++-NH3 | b-H2O  | b-NH3   | Seq. | y       | y++    | y++-H2O | y++-NH3 | y-H2O   | y-NH3   | #  |
|----|---------|--------|---------|---------|--------|---------|------|---------|--------|---------|---------|---------|---------|----|
| 1  |         |        |         |         |        |         | K    | 1216.71 | 608.86 | 599.86  | 600.35  | 1198.7  | 1199.69 | 10 |
| 2  | 257.16  |        |         |         |        | 240.13  | Q    | 1088.62 | 544.81 | 535.81  | 536.3   | 1070.61 | 1071.59 | 9  |
| 3  | 358.21  |        |         |         | 340.2  | 341.18  | T    | 960.56  | 480.78 | 471.78  | 472.27  | 942.55  | 943.53  | 8  |
| 4  | 429.25  |        |         |         | 411.24 | 412.22  | A    | 859.51  | 430.26 | 421.25  | 421.75  | 841.5   | 842.49  | 7  |
| 5  | 542.33  |        |         |         | 524.32 | 525.3   | L    | 788.48  | 394.74 | 385.74  | 386.23  | 770.46  | 771.45  | 6  |
| 6  | 641.4   | 321.2  | 312.2   | 312.69  | 623.39 | 624.37  | V    | 675.39  | 338.2  | 329.19  | 329.69  | 657.38  | 658.36  | 5  |
| 7  | 844.44  | 422.72 | 413.72  | 414.21  | 826.43 | 827.41  | E"   | 576.32  |        |         |         | 558.31  | 559.3   | 4  |
| 8  | 957.53  | 479.27 | 470.26  | 470.75  | 939.51 | 940.5   | L    | 373.28  |        |         |         |         | 356.25  | 3  |
| 9  | 1070.61 | 535.81 | 526.8   | 527.3   | 1052.6 | 1053.58 | L    | 260.2   |        |         |         |         | 243.17  | 2  |
| 10 |         |        |         |         |        |         | K    | 147.11  |        |         |         |         | 130.09  | 1  |

D2.

R.DTHKSEIAHR.F (+2) - Mod : 74.00 at E(6) - Retention time : 3.88 min - Precursor m/z : 634.40 - Precursor int. : 17090.100 - Basepeak int. : 6144.300

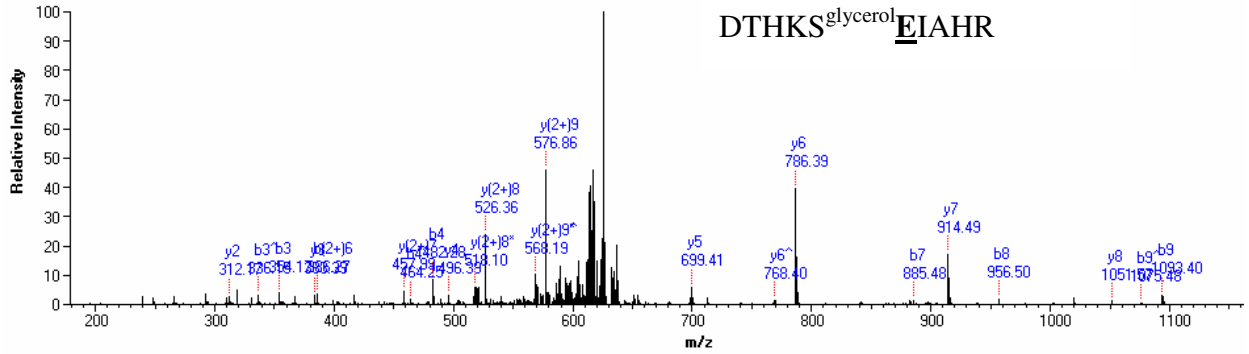

| #  | b       | b++    | b+++H2O | b+++NH3 | b-H2O   | b-NH3   | Seq. | y       | y++    | y+++H2O | y+++NH3 | y-H2O   | y-NH3   | #  |
|----|---------|--------|---------|---------|---------|---------|------|---------|--------|---------|---------|---------|---------|----|
| 1  |         |        |         |         |         |         | D    | 1267.6  | 634.3  | 625.3   | 625.79  | 1249.59 | 1250.58 | 10 |
| 2  | 217.08  |        |         |         | 199.07  |         | T    | 1152.57 | 576.79 | 567.79  | 568.28  | 1134.56 | 1135.55 | 9  |
| 3  | 354.14  |        |         |         | 336.13  |         | H    | 1051.53 | 526.27 | 517.26  | 517.75  | 1033.52 | 1034.5  | 8  |
| 4  | 482.24  |        |         |         | 464.23  | 465.21  | K    | 914.47  | 457.74 | 448.73  | 449.22  | 896.46  | 897.44  | 7  |
| 5  | 569.27  |        |         |         | 551.26  | 552.24  | S    | 786.37  | 393.69 | 384.68  | 385.18  | 768.36  | 769.35  | 6  |
| 6  | 772.31  | 386.66 | 377.65  | 378.15  | 754.3   | 755.28  | E"   | 699.34  | 350.17 | 341.17  | 341.66  | 681.33  | 682.31  | 5  |
| 7  | 885.39  | 443.2  | 434.2   | 434.69  | 867.38  | 868.37  | I    | 496.3   |        |         |         |         | 479.27  | 4  |
| 8  | 956.43  | 478.72 | 469.71  | 470.21  | 938.42  | 939.41  | A    | 383.21  |        |         |         |         | 366.19  | 3  |
| 9  | 1093.49 | 547.25 | 538.24  | 538.74  | 1075.48 | 1076.46 | H    | 312.18  |        |         |         |         | 295.15  | 2  |
| 10 |         |        |         |         |         |         | R    | 175.12  |        |         |         |         | 158.09  | 1  |

D3.

R.FKDLGEEHFK.G (+2) - Mod : 74.00 at E(7) - Retention time : 32.21 min - Precursor m/z : 662.39 - Precursor int. : 198169.000 - Basepeak int. : 87264.400

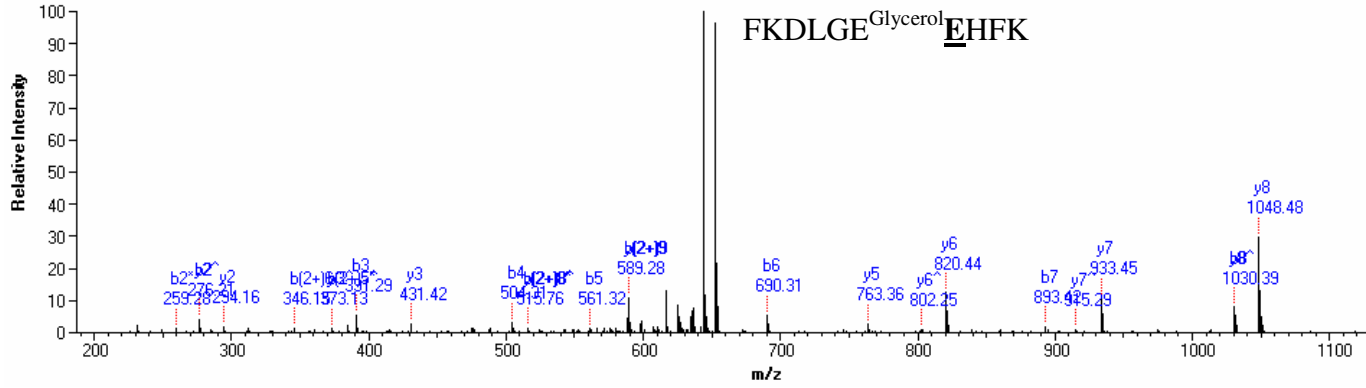

| #  | b       | b++    | b+++H2O | b+++NH3 | b-H2O   | b-NH3   | Seq. | y       | y++    | y++H2O | y++NH3 | y-H2O   | y-NH3   | #  |
|----|---------|--------|---------|---------|---------|---------|------|---------|--------|--------|--------|---------|---------|----|
| 1  |         |        |         |         |         |         | F    | 1323.62 | 662.31 | 653.31 | 653.8  | 1305.61 | 1306.59 | 10 |
| 2  | 276.17  |        |         |         |         | 259.14  | K    | 1176.55 | 588.78 | 579.77 | 580.27 | 1158.54 | 1159.53 | 9  |
| 3  | 391.2   |        |         |         | 373.19  | 374.17  | D    | 1048.46 | 524.73 | 515.73 | 516.22 | 1030.45 | 1031.43 | 8  |
| 4  | 504.28  |        |         |         | 486.27  | 487.26  | L    | 933.43  | 467.22 | 458.21 | 458.71 | 915.42  | 916.4   | 7  |
| 5  | 561.3   |        |         |         | 543.29  | 544.28  | G    | 820.35  | 410.68 | 401.67 | 402.16 | 802.34  | 803.32  | 6  |
| 6  | 690.35  | 345.68 | 336.67  | 337.16  | 672.34  | 673.32  | E    | 763.32  | 382.17 | 373.16 | 373.65 | 745.31  | 746.3   | 5  |
| 7  | 893.39  | 447.2  | 438.19  | 438.68  | 875.38  | 876.36  | E"   | 634.28  | 317.64 | 308.64 | 309.13 | 616.27  | 617.26  | 4  |
| 8  | 1030.45 | 515.73 | 506.72  | 507.21  | 1012.44 | 1013.42 | H    | 431.24  |        |        |        |         | 414.21  | 3  |
| 9  | 1177.52 | 589.26 | 580.26  | 580.75  | 1159.51 | 1160.49 | F    | 294.18  |        |        |        |         | 277.15  | 2  |
| 10 |         |        |         |         |         |         | K    | 147.11  |        |        |        |         | 130.09  | 1  |



D4.

K.DLGE<sup>glycerol</sup>E<sup>u</sup>HFK - Mod : 74.00 at E(4) - Retention time : 31.19 min - Precursor m/z : 524.96 - Precursor int. : 102253.000 - Basepeak int. : 29628.700

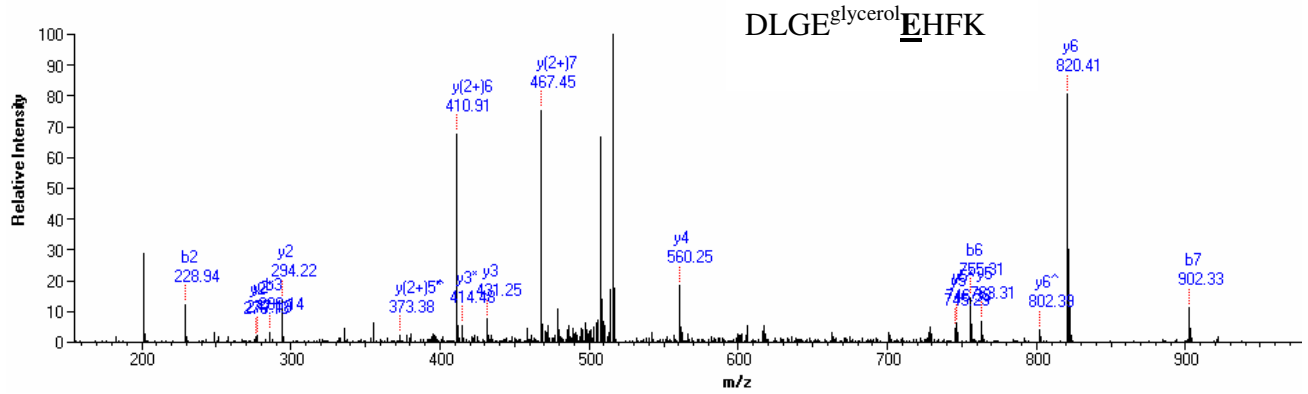

| # | b      | b++    | b+++H2O | b-H2O  | Seq.           | y       | y++    | y+++H2O | y+++NH3 | y-H2O   | y-NH3   | # |
|---|--------|--------|---------|--------|----------------|---------|--------|---------|---------|---------|---------|---|
| 1 |        |        |         |        | D              | 1048.46 | 524.73 | 515.73  | 516.22  | 1030.45 | 1031.43 | 8 |
| 2 | 229.12 |        |         | 211.11 | L              | 933.43  | 467.22 | 458.21  | 458.71  | 915.42  | 916.4   | 7 |
| 3 | 286.14 |        |         | 268.13 | G              | 820.35  | 410.68 | 401.67  | 402.16  | 802.34  | 803.32  | 6 |
| 4 | 415.18 |        |         | 397.17 | E              | 763.32  | 382.17 | 373.16  | 373.65  | 745.31  | 746.3   | 5 |
| 5 | 618.23 | 309.62 | 300.61  | 600.21 | E <sup>u</sup> | 634.28  | 317.64 | 308.64  | 309.13  | 616.27  | 617.26  | 4 |
| 6 | 755.28 | 378.15 | 369.14  | 737.27 | H              | 431.24  |        |         |         |         | 414.21  | 3 |
| 7 | 902.35 | 451.68 | 442.67  | 884.34 | F              | 294.18  |        |         |         |         | 277.15  | 2 |
| 8 |        |        |         |        | K              | 147.11  |        |         |         |         | 130.09  | 1 |

D5.

K.LVNELTEFAK.T (+2) - Mod : 74.00 at E(4) - Retention time : 41.81 min - Precursor m/z : 619.51 - Precursor int. : 3429480.000 - Basepeak int. : 745321.000

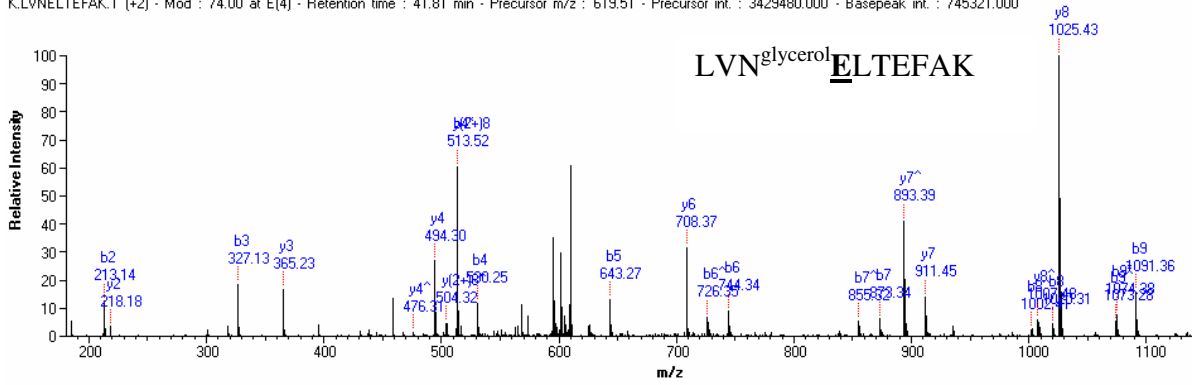

| #  | b       | b++    | b+++H2O | b+++NH3 | b-H2O   | b-NH3   | Seq. | y       | y++    | y+++H2O | y+++NH3 | y-H2O   | y-NH3   | #  |
|----|---------|--------|---------|---------|---------|---------|------|---------|--------|---------|---------|---------|---------|----|
| 1  |         |        |         |         |         |         | L    | 1237.63 | 619.32 | 610.31  | 610.81  | 1219.62 | 1220.6  | 10 |
| 2  | 213.16  |        |         |         |         |         | V    | 1124.55 | 562.78 | 553.77  | 554.26  | 1106.54 | 1107.52 | 9  |
| 3  | 327.2   |        |         |         |         | 310.18  | N    | 1025.48 | 513.24 | 504.24  | 504.73  | 1007.47 | 1008.45 | 8  |
| 4  | 530.25  |        |         |         | 512.24  | 513.22  | E"   | 911.43  | 456.22 | 447.22  | 447.71  | 893.42  | 894.41  | 7  |
| 5  | 643.33  | 322.17 | 313.16  | 313.66  | 625.32  | 626.3   | L    | 708.39  | 354.7  | 345.69  | 346.19  | 690.38  | 691.37  | 6  |
| 6  | 744.38  | 372.69 | 363.69  | 364.18  | 726.37  | 727.35  | T    | 595.31  |        |         |         | 577.3   | 578.28  | 5  |
| 7  | 873.42  | 437.21 | 428.21  | 428.7   | 855.41  | 856.39  | E    | 494.26  |        |         |         | 476.25  | 477.23  | 4  |
| 8  | 1020.49 | 510.75 | 501.74  | 502.23  | 1002.48 | 1003.46 | F    | 365.22  |        |         |         |         | 348.19  | 3  |
| 9  | 1091.53 | 546.27 | 537.26  | 537.75  | 1073.52 | 1074.5  | A    | 218.15  |        |         |         |         | 201.12  | 2  |
| 10 |         |        |         |         |         |         | K    | 147.11  |        |         |         |         | 130.09  | 1  |

D6.

LVLNELTEFAK.T (+2) - Mod : 74.00 at E(7) - Retention time : 42.65 min - Precursor m/z : 619.49 - Precursor int. : 314025.000 - Basepeak int. : 77676.300

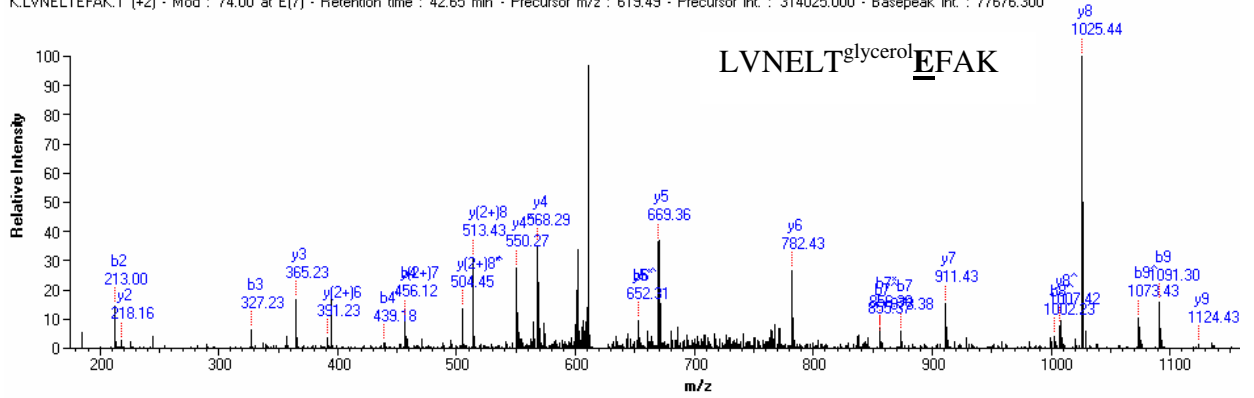

| #  | b       | b++    | b+++H2O | b+++NH3 | b-H2O   | b-NH3   | Seq. | y       | y++    | y+++H2O | y+++NH3 | y-H2O   | y-NH3   | #  |
|----|---------|--------|---------|---------|---------|---------|------|---------|--------|---------|---------|---------|---------|----|
| 1  |         |        |         |         |         |         | L    | 1237.63 | 619.32 | 610.31  | 610.81  | 1219.62 | 1220.6  | 10 |
| 2  | 213.16  |        |         |         |         |         | V    | 1124.55 | 562.78 | 553.77  | 554.26  | 1106.54 | 1107.52 | 9  |
| 3  | 327.2   |        |         |         |         | 310.18  | N    | 1025.48 | 513.24 | 504.24  | 504.73  | 1007.47 | 1008.45 | 8  |
| 4  | 456.25  |        |         |         | 438.24  | 439.22  | E    | 911.43  | 456.22 | 447.22  | 447.71  | 893.42  | 894.41  | 7  |
| 5  | 569.33  |        |         |         | 551.32  | 552.3   | L    | 782.39  | 391.7  | 382.69  | 383.19  | 764.38  | 765.37  | 6  |
| 6  | 670.38  | 335.69 | 326.69  | 327.18  | 652.37  | 653.35  | T    | 669.31  | 335.16 | 326.15  | 326.64  | 651.3   | 652.28  | 5  |
| 7  | 873.42  | 437.21 | 428.21  | 428.7   | 855.41  | 856.39  | E"   | 568.26  |        |         |         | 550.25  | 551.23  | 4  |
| 8  | 1020.49 | 510.75 | 501.74  | 502.23  | 1002.48 | 1003.46 | F    | 365.22  |        |         |         |         | 348.19  | 3  |
| 9  | 1091.53 | 546.27 | 537.26  | 537.75  | 1073.52 | 1074.5  | A    | 218.15  |        |         |         |         | 201.12  | 2  |
| 10 |         |        |         |         |         |         | K    | 147.11  |        |         |         |         | 130.09  | 1  |

D7.

K.AEFV<sup>glycerol</sup>E<sup>u</sup>VTK - Mod : 74.00 at E(5) - Retention time : 33.60 min - Precursor m/z : 498.89 - Precursor int. : 563012.000 - Basepeak int. : 161276.000

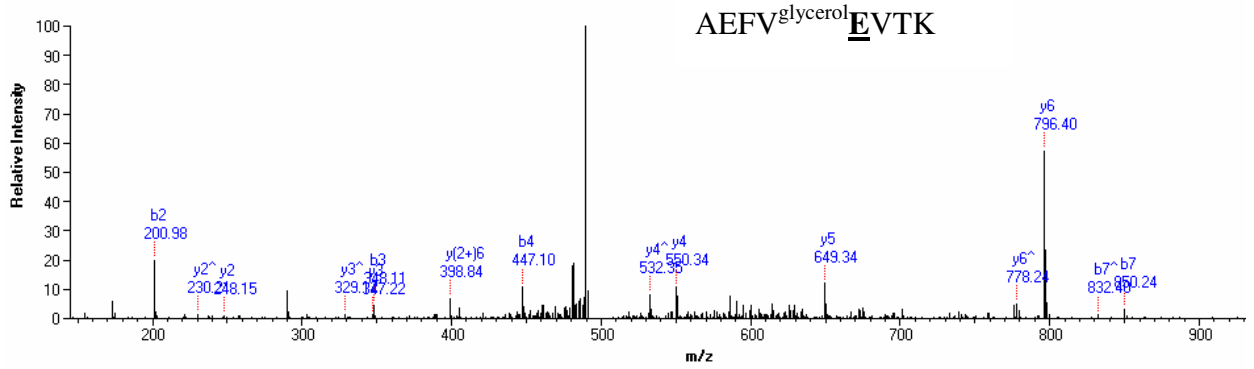

| # | b      | b++    | b+++-H2O | b-H2O  | Seq. | y      | y++    | y+++-H2O | y+++-NH3 | y-H2O  | y-NH3  | # |
|---|--------|--------|----------|--------|------|--------|--------|----------|----------|--------|--------|---|
| 1 |        |        |          |        | A    | 996.49 | 498.75 | 489.74   | 490.23   | 978.48 | 979.46 | 8 |
| 2 | 201.09 |        |          | 183.08 | E    | 925.45 | 463.23 | 454.22   | 454.72   | 907.44 | 908.42 | 7 |
| 3 | 348.16 |        |          | 330.15 | F    | 796.41 | 398.71 | 389.7    | 390.19   | 778.4  | 779.38 | 6 |
| 4 | 447.22 |        |          | 429.21 | V    | 649.34 | 325.17 | 316.17   | 316.66   | 631.33 | 632.31 | 5 |
| 5 | 650.27 | 325.64 | 316.63   | 632.26 | E"   | 550.27 |        |          |          | 532.26 | 533.24 | 4 |
| 6 | 749.34 | 375.17 | 366.17   | 731.32 | V    | 347.23 |        |          |          | 329.22 | 330.2  | 3 |
| 7 | 850.38 | 425.7  | 416.69   | 832.37 | T    | 248.16 |        |          |          | 230.15 | 231.13 | 2 |
| 8 |        |        |          |        | K    | 147.11 |        |          |          |        | 130.09 | 1 |

D8.

R.RHPEYAVSVLLR.L (+2) - Mod : 74.00 at E(4) - Retention time : 34.75 min - Precursor m/z : 757.60 - Precursor int. : 548448.000 - Basepeak int. : 90986.400

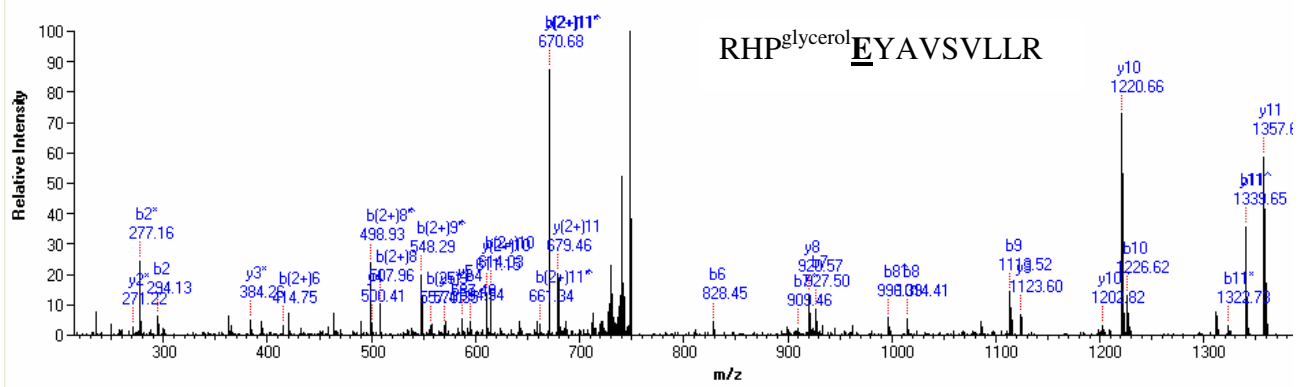

| #  | b       | b++    | b++-H2O | b++-NH3 | b-H2O   | b-NH3   | Seq. | y       | y++    | y++-H2O | y++-NH3 | y-H2O   | y-NH3   | #  |
|----|---------|--------|---------|---------|---------|---------|------|---------|--------|---------|---------|---------|---------|----|
| 1  |         |        |         |         |         |         | R    | 1513.81 | 757.41 | 748.4   | 748.9   | 1495.8  | 1496.79 | 12 |
| 2  | 294.17  |        |         |         |         | 277.14  | H    | 1357.71 | 679.36 | 670.35  | 670.85  | 1339.7  | 1340.68 | 11 |
| 3  | 391.22  |        |         |         |         | 374.19  | P    | 1220.65 | 610.83 | 601.82  | 602.32  | 1202.64 | 1203.62 | 10 |
| 4  | 594.26  |        |         |         | 576.25  | 577.24  | E"   | 1123.6  | 562.3  | 553.3   | 553.79  | 1105.59 | 1106.57 | 9  |
| 5  | 757.33  | 379.17 | 370.16  | 370.65  | 739.32  | 740.3   | Y    | 920.56  | 460.78 | 451.78  | 452.27  | 902.55  | 903.53  | 8  |
| 6  | 828.36  | 414.69 | 405.68  | 406.17  | 810.35  | 811.34  | A    | 757.49  | 379.25 | 370.24  | 370.74  | 739.48  | 740.47  | 7  |
| 7  | 927.43  | 464.22 | 455.21  | 455.71  | 909.42  | 910.41  | V    | 686.46  | 343.73 | 334.73  | 335.22  | 668.44  | 669.43  | 6  |
| 8  | 1014.46 | 507.74 | 498.73  | 499.22  | 996.45  | 997.44  | S    | 587.39  |        |         |         | 569.38  | 570.36  | 5  |
| 9  | 1113.53 | 557.27 | 548.26  | 548.76  | 1095.52 | 1096.51 | V    | 500.35  |        |         |         |         | 483.33  | 4  |
| 10 | 1226.62 | 613.81 | 604.81  | 605.3   | 1208.61 | 1209.59 | L    | 401.29  |        |         |         |         | 384.26  | 3  |
| 11 | 1339.7  | 670.35 | 661.35  | 661.84  | 1321.69 | 1322.67 | L    | 288.2   |        |         |         |         | 271.18  | 2  |
| 12 |         |        |         |         |         |         | R    | 175.12  |        |         |         |         | 158.09  | 1  |

D9.

K.HLVDEPQNLIK (+2) - Mod : 74.00 at E(5) - Retention time : 38.19 min - Precursor m/z : 690.59 - Precursor int. : 4499390.000 - Basepeak int. : 914565.000

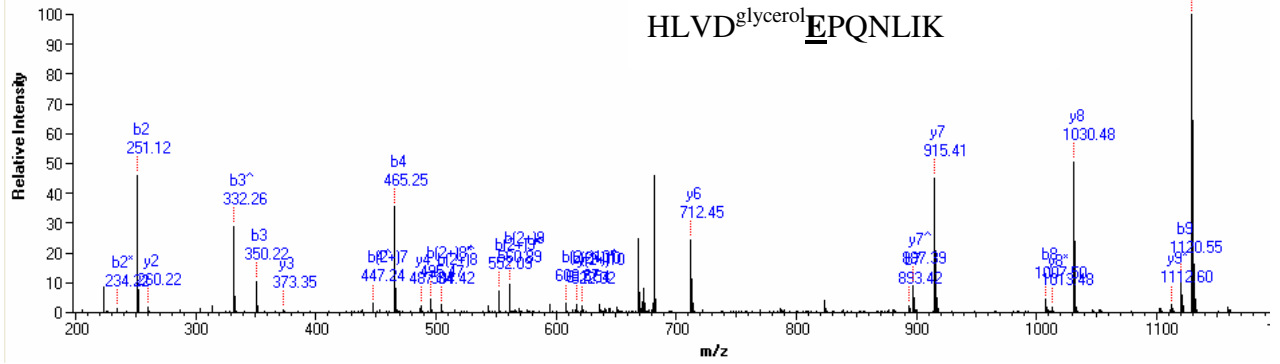

| #  | b       | b++    | b+++H2O | b+++NH3 | b-H2O   | b-NH3   | Seq. | y       | y++    | y+++H2O | y+++NH3 | y-H2O   | y-NH3   | #  |
|----|---------|--------|---------|---------|---------|---------|------|---------|--------|---------|---------|---------|---------|----|
| 1  |         |        |         |         |         |         | H    | 1379.72 | 690.36 | 681.36  | 681.85  | 1361.71 | 1362.69 | 11 |
| 2  | 251.15  |        |         |         |         |         | L    | 1242.66 | 621.83 | 612.83  | 613.32  | 1224.65 | 1225.63 | 10 |
| 3  | 350.22  |        |         |         |         |         | V    | 1129.57 | 565.29 | 556.28  | 556.78  | 1111.56 | 1112.55 | 9  |
| 4  | 465.25  |        |         |         | 447.24  |         | D    | 1030.5  | 515.76 | 506.75  | 507.24  | 1012.49 | 1013.48 | 8  |
| 5  | 668.29  | 334.65 | 325.64  |         | 650.28  |         | E"   | 915.48  | 458.24 | 449.24  | 449.73  | 897.47  | 898.45  | 7  |
| 6  | 765.34  | 383.17 | 374.17  |         | 747.33  |         | P    | 712.43  | 356.72 |         | 348.21  |         | 695.41  | 6  |
| 7  | 893.4   | 447.2  | 438.2   | 438.69  | 875.39  | 876.37  | Q    | 615.38  | 308.19 |         | 299.68  |         | 598.36  | 5  |
| 8  | 1007.44 | 504.23 | 495.22  | 495.71  | 989.43  | 990.42  | N    | 487.32  |        |         |         |         | 470.3   | 4  |
| 9  | 1120.53 | 560.77 | 551.76  | 552.25  | 1102.52 | 1103.5  | L    | 373.28  |        |         |         |         | 356.25  | 3  |
| 10 | 1233.61 | 617.31 | 608.3   | 608.8   | 1215.6  | 1216.58 | I    | 260.2   |        |         |         |         | 243.17  | 2  |
| 11 |         |        |         |         |         |         | K    | 147.11  |        |         |         |         | 130.09  | 1  |

# D10.

K.QTALVELLK.H (+2) - Mod : 74.00 at E(6) - Retention time : 42.65 min - Precursor m/z : 545.10 - Precursor int. : 302657.000 - Basepeak int. : 462649.000

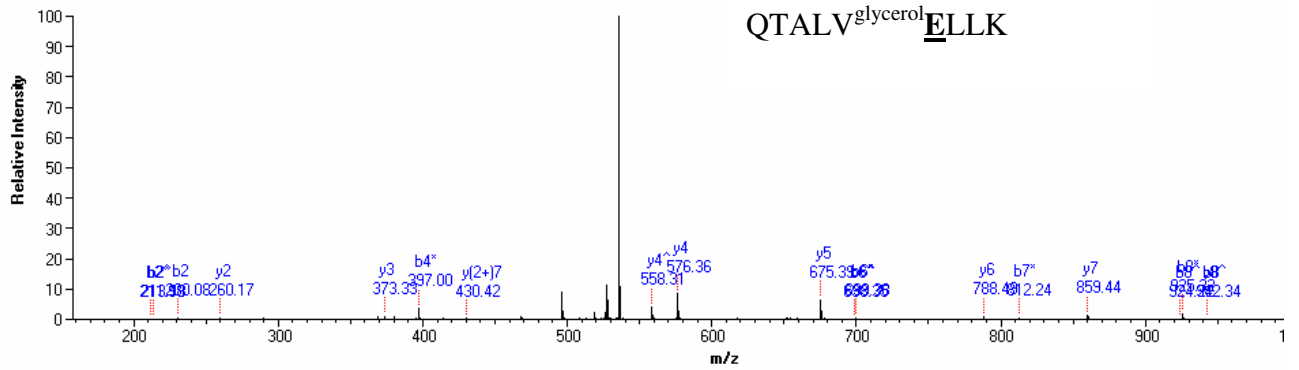

| # | b      | b++    | b+++H2O | b+++NH3 | b-H2O  | b-NH3  | Seq. | y       | y++    | y+++H2O | y+++NH3 | y-H2O   | y-NH3   | # |
|---|--------|--------|---------|---------|--------|--------|------|---------|--------|---------|---------|---------|---------|---|
| 1 |        |        |         |         |        |        | Q    | 1088.62 | 544.81 | 535.81  | 536.3   | 1070.61 | 1071.59 | 9 |
| 2 | 230.11 |        |         |         | 212.1  | 213.09 | T    | 960.56  | 480.78 | 471.78  | 472.27  | 942.55  | 943.53  | 8 |
| 3 | 301.15 |        |         |         | 283.14 | 284.12 | A    | 859.51  | 430.26 | 421.25  | 421.75  | 841.5   | 842.49  | 7 |
| 4 | 414.24 |        |         |         | 396.22 | 397.21 | L    | 788.48  | 394.74 | 385.74  | 386.23  | 770.46  | 771.45  | 6 |
| 5 | 513.3  |        |         |         | 495.29 | 496.28 | V    | 675.39  | 338.2  | 329.19  | 329.69  | 657.38  | 658.36  | 5 |
| 6 | 716.35 | 358.68 | 349.67  | 350.16  | 698.34 | 699.32 | E"   | 576.32  |        |         |         | 558.31  | 559.3   | 4 |
| 7 | 829.43 | 415.22 | 406.21  | 406.71  | 811.42 | 812.4  | L    | 373.28  |        |         |         |         | 356.25  | 3 |
| 8 | 942.51 | 471.76 | 462.76  | 463.25  | 924.5  | 925.49 | L    | 260.2   |        |         |         |         | 243.17  | 2 |
| 9 |        |        |         |         |        |        | K    | 147.11  |        |         |         |         | 130.09  | 1 |

D11.

K.KQTALVELLK.H (+2) - Mod : 74.00 at E(7) - Retention time : 36.24 min - Precursor m/z : 609.17 - Precursor int. : 3236940.000 - Basepeak int. : 185929.000

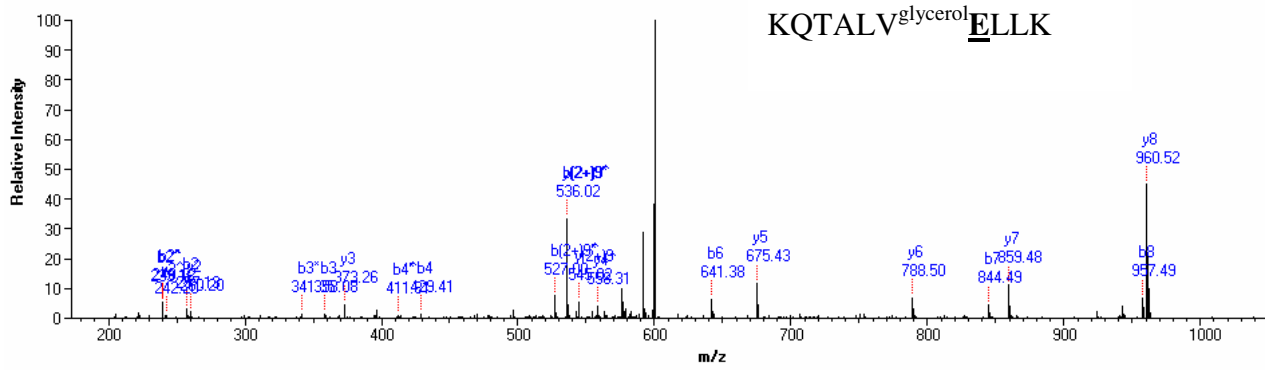

| #  | b       | b++    | b++-H2O | b++-NH3 | b-H2O  | b-NH3   | Seq. | y       | y++    | y++-H2O | y++-NH3 | y-H2O   | y-NH3   | #  |
|----|---------|--------|---------|---------|--------|---------|------|---------|--------|---------|---------|---------|---------|----|
| 1  |         |        |         |         |        |         | K    | 1216.71 | 608.86 | 599.86  | 600.35  | 1198.7  | 1199.69 | 10 |
| 2  | 257.16  |        |         |         |        | 240.13  | Q    | 1088.62 | 544.81 | 535.81  | 536.3   | 1070.61 | 1071.59 | 9  |
| 3  | 358.21  |        |         |         | 340.2  | 341.18  | T    | 960.56  | 480.78 | 471.78  | 472.27  | 942.55  | 943.53  | 8  |
| 4  | 429.25  |        |         |         | 411.24 | 412.22  | A    | 859.51  | 430.26 | 421.25  | 421.75  | 841.5   | 842.49  | 7  |
| 5  | 542.33  |        |         |         | 524.32 | 525.3   | L    | 788.48  | 394.74 | 385.74  | 386.23  | 770.46  | 771.45  | 6  |
| 6  | 641.4   | 321.2  | 312.2   | 312.69  | 623.39 | 624.37  | V    | 675.39  | 338.2  | 329.19  | 329.69  | 657.38  | 658.36  | 5  |
| 7  | 844.44  | 422.72 | 413.72  | 414.21  | 826.43 | 827.41  | E"   | 576.32  |        |         |         | 558.31  | 559.3   | 4  |
| 8  | 957.53  | 479.27 | 470.26  | 470.75  | 939.51 | 940.5   | L    | 373.28  |        |         |         |         | 366.25  | 3  |
| 9  | 1070.61 | 535.81 | 526.8   | 527.3   | 1052.6 | 1053.58 | L    | 260.2   |        |         |         |         | 243.17  | 2  |
| 10 |         |        |         |         |        |         | K    | 147.11  |        |         |         |         | 130.09  | 1  |



# D12.

K.LVTDLTK.V (+2) - Mod : 74.00 at D(4) - Retention time : 31.29 min - Precursor m/z : 432.35 - Precursor int. : 225460.000 - Basepeak int. : 132124.000

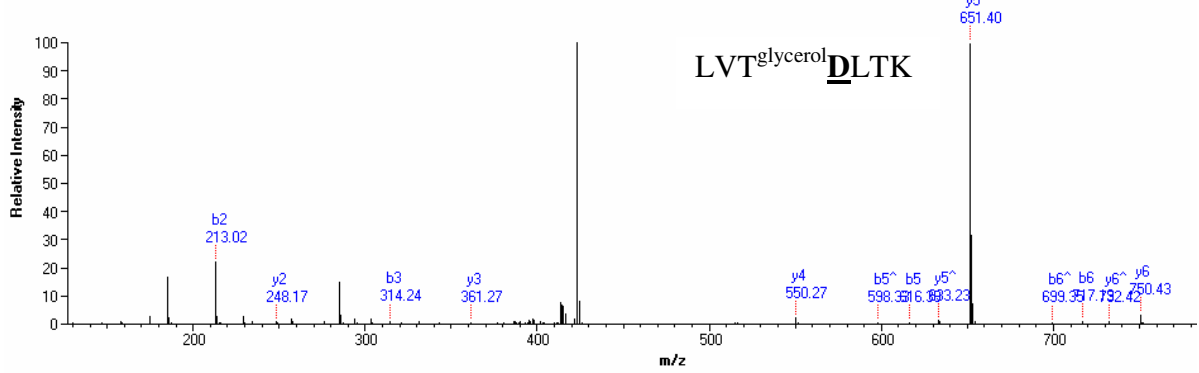

| # | b      | b++    | b+++H2O | b-H2O  | Seq. | y      | y++    | y++-H2O | y++-NH3 | y-H2O  | y-NH3  | # |
|---|--------|--------|---------|--------|------|--------|--------|---------|---------|--------|--------|---|
| 1 |        |        |         |        | L    | 863.47 | 432.24 | 423.23  | 423.73  | 845.46 | 846.45 | 7 |
| 2 | 213.16 |        |         |        | V    | 750.39 | 375.7  | 366.69  | 367.18  | 732.38 | 733.36 | 6 |
| 3 | 314.21 |        |         | 296.2  | T    | 651.32 | 326.16 | 317.16  | 317.65  | 633.31 | 634.29 | 5 |
| 4 | 503.23 |        |         | 485.22 | D"   | 550.27 |        |         |         | 532.26 | 533.24 | 4 |
| 5 | 616.32 | 308.66 | 299.66  | 598.31 | L    | 361.24 |        |         |         | 343.23 | 344.22 | 3 |
| 6 | 717.37 | 359.19 | 350.18  | 699.36 | T    | 248.16 |        |         |         | 230.15 | 231.13 | 2 |
| 7 |        |        |         |        | K    | 147.11 |        |         |         |        | 130.09 | 1 |
