# Supplementary material
Source: PubMed Central journal article supplement (PMC2911956)
Supplement: NIHMS218449-supplement-T1.pdf [file NIHMS218449-supplement-T1.pdf]

**Supplemental Information T1:** The number of peptides identified in BSA with either Glu-methylation or Glu-ethylation induced by various destaining/washing solutions during in-gel digestion.

| Destaining Solution                        | Frequency of E-methylation | Frequency of E-ethylation |
|--------------------------------------------|----------------------------|---------------------------|
| EtOH/H <sub>2</sub> O<br>(50%/50%)         | 0                          | 1                         |
| HAc/H <sub>2</sub> O/EtOH<br>(10%/40%/50%) | 0                          | 2                         |
| MeOH/H <sub>2</sub> O<br>(50%/50%)         | 0                          | 0                         |
| HAc/H <sub>2</sub> O/MeOH<br>(10%/40%/50%) | 4 <sup>18</sup>            | 0                         |

<sup>18</sup>Jung, S. Y.; Li, Y.; Wang, Y.; Chen, Y.; Zhao, Y.; Qin, J., Complications in the assignment of 14 and 28 da mass shift detected by mass spectrometry as in vivo methylation from endogenous proteins. *Anal Chem* **2008**, 80, (5), 1721-9.

**Supplemental Information T2:** The number of peptides identified with any one of four types of modification (Lys -19 Da from histone H4, Cys +108 Da, Cys +76 Da, Cys + 71 Da from BSA) following in-gel or in-solution tryptic digestion.

| <b>Type of modifications</b> |                                            | <b>Frequency of modifications, in-gel digestion</b> | <b>Frequency of modifications, in-solution digestion</b> |
|------------------------------|--------------------------------------------|-----------------------------------------------------|----------------------------------------------------------|
| <b>Modified residue</b>      | <b>Mass shift (<math>\Delta</math> Da)</b> |                                                     |                                                          |
| Lys                          | - 19                                       | 8                                                   | 0                                                        |
| Cys                          | + 108                                      | 6                                                   | 0                                                        |
| Cys                          | + 76<br>(mercaptoethanol)                  | 15                                                  | 3                                                        |
| Cys                          | + 71<br>(acrylamide)                       | 18                                                  | 0                                                        |
